# Supplementary material
Source: PubMed Central journal article supplement (PMC6960456)

Supplementary Table S1. Suggestive ( $P < 1 \times 10^{-6}$ ) risk variants for multiple myeloma in AA population.

| SNP         | Position    | Alleles<br>risk ref | Meta        |                |                        |                       |                               | Set1                   |                       |                              | Set2                   |                       |                              |
|-------------|-------------|---------------------|-------------|----------------|------------------------|-----------------------|-------------------------------|------------------------|-----------------------|------------------------------|------------------------|-----------------------|------------------------------|
|             |             |                     | RAF<br>case | RAF<br>control | OR(95%CI) <sup>a</sup> | P-value               | P <sub>Het</sub> <sup>b</sup> | OR(95%CI) <sup>a</sup> | P-value               | Imputation<br>r <sup>2</sup> | OR(95%CI) <sup>a</sup> | P-value               | Imputation<br>r <sup>2</sup> |
| rs266375    | 15:67228085 | C T                 | 0.26        | 0.23           | 1.32(1.19,1.46)        | $1.45 \times 10^{-7}$ | 0.43                          | 1.36(1.20,1.54)        | $2.17 \times 10^{-6}$ | 0.58                         | 1.24(1.04,1.49)        | 0.02                  | 0.83                         |
| rs2047077   | 12:66887206 | G C                 | 0.06        | 0.05           | 1.66(1.37,2.01)        | $2.42 \times 10^{-7}$ | 0.14                          | 1.52(1.22,1.9)         | $1.97 \times 10^{-4}$ | 0.68                         | 2.13(1.45,3.12)        | $1.07 \times 10^{-4}$ | 0.90                         |
| rs10457096  | 6:156265122 | G A                 | 0.03        | 0.02           | 2.06(1.56,2.73)        | $3.26 \times 10^{-7}$ | 0.97                          | 2.07(1.49,2.88)        | $1.39 \times 10^{-5}$ | 0.50                         | 2.05(1.21,3.45)        | $7.27 \times 10^{-3}$ | 0.75                         |
| rs13296848  | 9:701529    | C T                 | 0.33        | 0.29           | 1.25(1.15,1.36)        | $3.44 \times 10^{-7}$ | 0.01                          | 1.16(1.05,1.28)        | $4.55 \times 10^{-3}$ | 0.82                         | 1.5(1.28,1.76)         | $5.51 \times 10^{-7}$ | 0.93                         |
| rs4913513   | 12:66881488 | G A                 | 0.06        | 0.05           | 1.64(1.36,1.99)        | $3.57 \times 10^{-7}$ | 0.12                          | 1.51(1.21,1.88)        | $2.89 \times 10^{-4}$ | 0.69                         | 2.13(1.45,3.11)        | $1.00 \times 10^{-4}$ | 0.91                         |
| rs117284313 | 12:66880343 | A G                 | 0.06        | 0.05           | 1.64(1.35,1.99)        | $3.99 \times 10^{-7}$ | 0.12                          | 1.50(1.20,1.87)        | $3.13 \times 10^{-4}$ | 0.69                         | 2.12(1.45,3.11)        | $1.02 \times 10^{-4}$ | 0.91                         |
| rs11176202  | 12:66858679 | A T                 | 0.05        | 0.04           | 1.66(1.36,2.02)        | $4.52 \times 10^{-7}$ | 0.22                          | 1.55(1.23,1.94)        | $1.85 \times 10^{-4}$ | 0.66                         | 2.05(1.39,3.04)        | $3.13 \times 10^{-4}$ | 0.90                         |
| rs80227918  | 12:66878336 | C T                 | 0.06        | 0.05           | 1.63(1.35,1.98)        | $4.77 \times 10^{-7}$ | 0.12                          | 1.50(1.20,1.87)        | $3.59 \times 10^{-4}$ | 0.69                         | 2.12(1.45,3.11)        | $1.04 \times 10^{-4}$ | 0.91                         |
| rs12369857  | 12:66865653 | A G                 | 0.04        | 0.03           | 1.76(1.41,2.19)        | $5.58 \times 10^{-7}$ | 0.15                          | 1.59(1.23,2.06)        | $3.90 \times 10^{-4}$ | 0.66                         | 2.30(1.50,3.53)        | $1.36 \times 10^{-4}$ | 0.89                         |
| rs28362345  | 6:31165836  | T C                 | 0.74        | 0.70           | 1.24(1.14,1.34)        | $5.90 \times 10^{-7}$ | 0.59                          | 1.25(1.14,1.38)        | $6.19 \times 10^{-6}$ | 1.00                         | 1.19(1.02,1.39)        | 0.03                  | 1.00                         |
| rs28362342  | 6:31165438  | T G                 | 0.74        | 0.70           | 1.23(1.14,1.34)        | $6.23 \times 10^{-7}$ | 0.61                          | 1.25(1.14,1.38)        | $6.76 \times 10^{-6}$ | 1.00                         | 1.19(1.02,1.39)        | 0.03                  | 1.00                         |
| rs114301391 | 5:77208230  | T C                 | 0.02        | 0.01           | 2.37(1.69,3.34)        | $7.21 \times 10^{-7}$ | 0.85                          | 2.31(1.51,3.54)        | $1.09 \times 10^{-4}$ | 0.69                         | 2.48(1.40,4.41)        | $1.92 \times 10^{-3}$ | 0.86                         |
| rs12194664  | 6:156260851 | T C                 | 0.03        | 0.02           | 2.01(1.52,2.66)        | $8.49 \times 10^{-7}$ | 0.96                          | 2.02(1.46,2.80)        | $2.53 \times 10^{-5}$ | 0.50                         | 1.99(1.17,3.37)        | 0.01                  | 0.76                         |
| rs12366841  | 12:66865701 | G A                 | 0.06        | 0.05           | 1.62(1.34,1.96)        | $9.06 \times 10^{-7}$ | 0.11                          | 1.48(1.18,1.84)        | $6.12 \times 10^{-4}$ | 0.68                         | 2.13(1.45,3.11)        | $1.07 \times 10^{-4}$ | 0.91                         |
| rs7034061   | 9:38443792  | T G                 | 0.15        | 0.13           | 1.32(1.18,1.48)        | $9.17 \times 10^{-7}$ | 1.00                          | 1.32(1.16,1.51)        | $3.54 \times 10^{-5}$ | 0.83                         | 1.33(1.08,1.63)        | $8.18 \times 10^{-3}$ | 0.95                         |

<sup>a</sup>Odds ratios (ORs) were adjusted for age, sex and the first 10 principle components from the PCA analysis.<sup>b</sup>P<sub>Het</sub> was P-value for the heterogeneity test in meta-analysis of the two sets.

Supplementary Table S2. Local African ancestry that were significantly associated with AA MM risk in both case-only analysis and case-control analysis in chromosome 2 (Meta  $P$ -value $<1\times 10^{-5}$ ).

| SNP        | Position | Case-only              |                       | Case-control           |                       |
|------------|----------|------------------------|-----------------------|------------------------|-----------------------|
|            |          | OR(95%CI) <sup>a</sup> | P-value               | OR(95%CI) <sup>b</sup> | P-value               |
| rs2592781  | 23185972 | 0.97(0.96, 0.98)       | 6.62×10 <sup>-6</sup> | 0.97(0.96, 0.98)       | 5.93×10 <sup>-6</sup> |
| rs2681019  | 23187504 | 0.97(0.96, 0.98)       | 6.62×10 <sup>-6</sup> | 0.97(0.96, 0.98)       | 5.93×10 <sup>-6</sup> |
| rs2592774  | 23192909 | 0.97(0.96, 0.98)       | 6.62×10 <sup>-6</sup> | 0.97(0.96, 0.98)       | 5.93×10 <sup>-6</sup> |
| rs12474212 | 23197435 | 0.97(0.96, 0.98)       | 6.62×10 <sup>-6</sup> | 0.97(0.96, 0.98)       | 5.93×10 <sup>-6</sup> |
| rs1446877  | 23216262 | 0.97(0.96, 0.98)       | 6.62×10 <sup>-6</sup> | 0.97(0.96, 0.98)       | 5.93×10 <sup>-6</sup> |
| rs17044554 | 23218255 | 0.97(0.96, 0.98)       | 6.62×10 <sup>-6</sup> | 0.97(0.96, 0.98)       | 5.93×10 <sup>-6</sup> |
| rs7581165  | 23872765 | 0.97(0.96, 0.98)       | 9.43×10 <sup>-6</sup> | 0.97(0.96, 0.98)       | 5.93×10 <sup>-6</sup> |
| rs1822300  | 24724785 | 0.97(0.96, 0.98)       | 3.84×10 <sup>-6</sup> | 0.97(0.96, 0.98)       | 9.42×10 <sup>-6</sup> |
| rs11125627 | 24725464 | 0.97(0.96, 0.98)       | 3.84×10 <sup>-6</sup> | 0.97(0.96, 0.98)       | 9.42×10 <sup>-6</sup> |
| rs7598617  | 24784168 | 0.97(0.96, 0.98)       | 3.84×10 <sup>-6</sup> | 0.97(0.96, 0.98)       | 9.42×10 <sup>-6</sup> |
| rs995647   | 24810255 | 0.97(0.96, 0.98)       | 3.84×10 <sup>-6</sup> | 0.97(0.96, 0.98)       | 9.42×10 <sup>-6</sup> |
| rs10208038 | 25032151 | 0.97(0.96, 0.98)       | 3.84×10 <sup>-6</sup> | 0.97(0.96, 0.98)       | 9.42×10 <sup>-6</sup> |
| rs4665273  | 25046355 | 0.97(0.96, 0.98)       | 3.84×10 <sup>-6</sup> | 0.97(0.96, 0.98)       | 9.42×10 <sup>-6</sup> |
| rs6760328  | 25077991 | 0.97(0.96, 0.98)       | 3.84×10 <sup>-6</sup> | 0.97(0.96, 0.98)       | 9.42×10 <sup>-6</sup> |
| rs6726261  | 25153986 | 0.97(0.96, 0.98)       | 3.84×10 <sup>-6</sup> | 0.97(0.96, 0.98)       | 9.42×10 <sup>-6</sup> |
| rs1172294  | 25169200 | 0.97(0.96, 0.98)       | 3.84×10 <sup>-6</sup> | 0.97(0.96, 0.98)       | 9.42×10 <sup>-6</sup> |
| rs6749526  | 25202668 | 0.97(0.96, 0.98)       | 3.84×10 <sup>-6</sup> | 0.97(0.96, 0.98)       | 9.42×10 <sup>-6</sup> |
| rs1982200  | 25205427 | 0.97(0.96, 0.98)       | 3.84×10 <sup>-6</sup> | 0.97(0.96, 0.98)       | 9.42×10 <sup>-6</sup> |
| rs893589   | 25259442 | 0.97(0.96, 0.98)       | 3.84×10 <sup>-6</sup> | 0.97(0.96, 0.98)       | 9.42×10 <sup>-6</sup> |
| rs2918630  | 25314186 | 0.97(0.96, 0.98)       | 3.57×10 <sup>-6</sup> | 0.97(0.96, 0.98)       | 8.80×10 <sup>-6</sup> |
| rs10495751 | 25316045 | 0.97(0.96, 0.98)       | 3.57×10 <sup>-6</sup> | 0.97(0.96, 0.98)       | 8.80×10 <sup>-6</sup> |
| rs13395518 | 25323747 | 0.97(0.96, 0.98)       | 3.57×10 <sup>-6</sup> | 0.97(0.96, 0.98)       | 8.80×10 <sup>-6</sup> |
| rs13401241 | 25518470 | 0.97(0.96, 0.98)       | 3.87×10 <sup>-6</sup> | 0.97(0.96, 0.98)       | 7.49×10 <sup>-6</sup> |
| rs749130   | 25530028 | 0.97(0.96, 0.98)       | 3.87×10 <sup>-6</sup> | 0.97(0.96, 0.98)       | 7.49×10 <sup>-6</sup> |
| rs6711622  | 25531350 | 0.97(0.96, 0.98)       | 3.87×10 <sup>-6</sup> | 0.97(0.96, 0.98)       | 7.49×10 <sup>-6</sup> |
| rs7560488  | 25568821 | 0.97(0.96, 0.98)       | 3.87×10 <sup>-6</sup> | 0.97(0.96, 0.98)       | 7.49×10 <sup>-6</sup> |
| rs6705138  | 25587851 | 0.97(0.96, 0.98)       | 3.87×10 <sup>-6</sup> | 0.97(0.96, 0.98)       | 7.49×10 <sup>-6</sup> |
| rs1010658  | 25595194 | 0.97(0.96, 0.98)       | 3.87×10 <sup>-6</sup> | 0.97(0.96, 0.98)       | 7.49×10 <sup>-6</sup> |
| rs730072   | 25597681 | 0.97(0.96, 0.98)       | 3.87×10 <sup>-6</sup> | 0.97(0.96, 0.98)       | 7.49×10 <sup>-6</sup> |
| rs2384232  | 25623749 | 0.97(0.96, 0.98)       | 3.07×10 <sup>-6</sup> | 0.97(0.96, 0.98)       | 6.47×10 <sup>-6</sup> |
| rs17745923 | 25643944 | 0.97(0.96, 0.98)       | 3.07×10 <sup>-6</sup> | 0.97(0.96, 0.98)       | 6.47×10 <sup>-6</sup> |
| rs6746082  | 25659244 | 0.97(0.96, 0.98)       | 3.07×10 <sup>-6</sup> | 0.97(0.96, 0.98)       | 6.47×10 <sup>-6</sup> |
| rs10210057 | 25662578 | 0.97(0.96, 0.98)       | 3.07×10 <sup>-6</sup> | 0.97(0.96, 0.98)       | 6.47×10 <sup>-6</sup> |
| rs6546183  | 25671806 | 0.97(0.96, 0.98)       | 3.07×10 <sup>-6</sup> | 0.97(0.96, 0.98)       | 6.47×10 <sup>-6</sup> |
| rs6546199  | 25683447 | 0.97(0.96, 0.98)       | 2.10×10 <sup>-6</sup> | 0.97(0.95, 0.98)       | 4.43×10 <sup>-6</sup> |
| rs1507705  | 25714916 | 0.97(0.96, 0.98)       | 2.10×10 <sup>-6</sup> | 0.97(0.95, 0.98)       | 4.43×10 <sup>-6</sup> |
| rs9309386  | 25727910 | 0.97(0.96, 0.98)       | 2.10×10 <sup>-6</sup> | 0.97(0.95, 0.98)       | 4.43×10 <sup>-6</sup> |
| rs517403   | 25730439 | 0.97(0.96, 0.98)       | 2.10×10 <sup>-6</sup> | 0.97(0.95, 0.98)       | 4.43×10 <sup>-6</sup> |

|            |          |                  |                       |                  |                       |
|------------|----------|------------------|-----------------------|------------------|-----------------------|
| rs936012   | 25755848 | 0.97(0.96, 0.98) | $2.10 \times 10^{-6}$ | 0.97(0.95, 0.98) | $4.43 \times 10^{-6}$ |
| rs6725591  | 25789849 | 0.97(0.96, 0.98) | $2.10 \times 10^{-6}$ | 0.97(0.95, 0.98) | $4.43 \times 10^{-6}$ |
| rs12613835 | 25829201 | 0.97(0.96, 0.98) | $2.10 \times 10^{-6}$ | 0.97(0.95, 0.98) | $4.43 \times 10^{-6}$ |
| rs11678268 | 25837156 | 0.97(0.96, 0.98) | $2.10 \times 10^{-6}$ | 0.97(0.95, 0.98) | $4.43 \times 10^{-6}$ |
| rs6546314  | 25845467 | 0.97(0.96, 0.98) | $2.10 \times 10^{-6}$ | 0.97(0.95, 0.98) | $4.43 \times 10^{-6}$ |
| rs858648   | 25867203 | 0.97(0.96, 0.98) | $2.10 \times 10^{-6}$ | 0.97(0.95, 0.98) | $4.43 \times 10^{-6}$ |
| rs6747116  | 25969729 | 0.97(0.96, 0.98) | $2.01 \times 10^{-6}$ | 0.97(0.95, 0.98) | $4.89 \times 10^{-6}$ |
| rs6546452  | 25981272 | 0.97(0.96, 0.98) | $2.01 \times 10^{-6}$ | 0.97(0.95, 0.98) | $4.89 \times 10^{-6}$ |
| rs6758088  | 26036036 | 0.97(0.96, 0.98) | $2.01 \times 10^{-6}$ | 0.97(0.95, 0.98) | $4.89 \times 10^{-6}$ |
| rs4063544  | 26042515 | 0.97(0.96, 0.98) | $2.01 \times 10^{-6}$ | 0.97(0.95, 0.98) | $4.89 \times 10^{-6}$ |
| rs2138390  | 26112833 | 0.97(0.96, 0.98) | $2.01 \times 10^{-6}$ | 0.97(0.95, 0.98) | $4.89 \times 10^{-6}$ |
| rs11895615 | 26113120 | 0.97(0.96, 0.98) | $2.01 \times 10^{-6}$ | 0.97(0.95, 0.98) | $4.89 \times 10^{-6}$ |
| rs6546642  | 26174103 | 0.97(0.96, 0.98) | $1.66 \times 10^{-6}$ | 0.97(0.96, 0.98) | $7.98 \times 10^{-6}$ |
| rs12994424 | 26183142 | 0.97(0.96, 0.98) | $1.66 \times 10^{-6}$ | 0.97(0.96, 0.98) | $7.98 \times 10^{-6}$ |
| rs7603456  | 26191296 | 0.97(0.96, 0.98) | $1.66 \times 10^{-6}$ | 0.97(0.96, 0.98) | $7.98 \times 10^{-6}$ |
| rs7563440  | 26199220 | 0.97(0.96, 0.98) | $1.66 \times 10^{-6}$ | 0.97(0.96, 0.98) | $7.98 \times 10^{-6}$ |
| rs4665298  | 26256378 | 0.97(0.96, 0.98) | $1.66 \times 10^{-6}$ | 0.97(0.96, 0.98) | $7.98 \times 10^{-6}$ |
| rs10170359 | 26272219 | 0.97(0.96, 0.98) | $1.66 \times 10^{-6}$ | 0.97(0.96, 0.98) | $7.98 \times 10^{-6}$ |
| rs12471809 | 26307140 | 0.97(0.96, 0.98) | $1.66 \times 10^{-6}$ | 0.97(0.96, 0.98) | $7.98 \times 10^{-6}$ |
| rs4665304  | 26313406 | 0.97(0.96, 0.98) | $1.66 \times 10^{-6}$ | 0.97(0.96, 0.98) | $7.98 \times 10^{-6}$ |
| rs1039823  | 28623159 | 0.97(0.96, 0.98) | $3.00 \times 10^{-6}$ | 0.97(0.95, 0.98) | $5.96 \times 10^{-6}$ |
| rs1396733  | 28642747 | 0.97(0.96, 0.98) | $3.00 \times 10^{-6}$ | 0.97(0.95, 0.98) | $5.96 \times 10^{-6}$ |
| rs4666076  | 28652529 | 0.97(0.96, 0.98) | $3.00 \times 10^{-6}$ | 0.97(0.95, 0.98) | $5.96 \times 10^{-6}$ |
| rs2940797  | 28670404 | 0.97(0.96, 0.98) | $3.00 \times 10^{-6}$ | 0.97(0.95, 0.98) | $5.96 \times 10^{-6}$ |
| rs2972050  | 28671048 | 0.97(0.96, 0.98) | $3.00 \times 10^{-6}$ | 0.97(0.95, 0.98) | $5.96 \times 10^{-6}$ |
| rs10186544 | 28683174 | 0.97(0.96, 0.98) | $3.20 \times 10^{-6}$ | 0.97(0.95, 0.98) | $2.39 \times 10^{-6}$ |
| rs1581035  | 28686332 | 0.97(0.96, 0.98) | $3.20 \times 10^{-6}$ | 0.97(0.95, 0.98) | $2.39 \times 10^{-6}$ |
| rs2940790  | 28687043 | 0.97(0.96, 0.98) | $3.20 \times 10^{-6}$ | 0.97(0.95, 0.98) | $2.39 \times 10^{-6}$ |
| rs6715256  | 28723942 | 0.97(0.96, 0.98) | $3.20 \times 10^{-6}$ | 0.97(0.95, 0.98) | $2.39 \times 10^{-6}$ |
| rs11885873 | 28736582 | 0.97(0.96, 0.98) | $3.20 \times 10^{-6}$ | 0.97(0.95, 0.98) | $2.39 \times 10^{-6}$ |
| rs4334451  | 28747170 | 0.97(0.96, 0.98) | $3.20 \times 10^{-6}$ | 0.97(0.95, 0.98) | $2.39 \times 10^{-6}$ |
| rs6547857  | 28757368 | 0.97(0.96, 0.98) | $3.20 \times 10^{-6}$ | 0.97(0.95, 0.98) | $2.39 \times 10^{-6}$ |
| rs11127162 | 28763374 | 0.97(0.96, 0.98) | $3.59 \times 10^{-6}$ | 0.97(0.95, 0.98) | $2.50 \times 10^{-6}$ |
| rs1881254  | 28768251 | 0.97(0.96, 0.98) | $3.59 \times 10^{-6}$ | 0.97(0.95, 0.98) | $2.50 \times 10^{-6}$ |
| rs9309663  | 28768427 | 0.97(0.96, 0.98) | $3.59 \times 10^{-6}$ | 0.97(0.95, 0.98) | $2.50 \times 10^{-6}$ |
| rs12617735 | 28780313 | 0.97(0.96, 0.98) | $3.59 \times 10^{-6}$ | 0.97(0.95, 0.98) | $2.50 \times 10^{-6}$ |
| rs7595633  | 28803240 | 0.97(0.96, 0.98) | $3.07 \times 10^{-6}$ | 0.97(0.95, 0.98) | $1.77 \times 10^{-6}$ |
| rs4666103  | 28807899 | 0.97(0.96, 0.98) | $3.07 \times 10^{-6}$ | 0.97(0.95, 0.98) | $1.77 \times 10^{-6}$ |
| rs12468715 | 28812285 | 0.97(0.96, 0.98) | $3.07 \times 10^{-6}$ | 0.97(0.95, 0.98) | $1.77 \times 10^{-6}$ |
| rs12993525 | 28818931 | 0.97(0.96, 0.98) | $3.07 \times 10^{-6}$ | 0.97(0.95, 0.98) | $1.77 \times 10^{-6}$ |
| rs1534477  | 28820641 | 0.97(0.96, 0.98) | $3.07 \times 10^{-6}$ | 0.97(0.95, 0.98) | $1.77 \times 10^{-6}$ |
| rs4371315  | 28821149 | 0.97(0.96, 0.98) | $3.07 \times 10^{-6}$ | 0.97(0.95, 0.98) | $1.77 \times 10^{-6}$ |
| rs7557449  | 28821695 | 0.97(0.96, 0.98) | $3.07 \times 10^{-6}$ | 0.97(0.95, 0.98) | $1.77 \times 10^{-6}$ |

|            |          |                  |                       |                  |                       |
|------------|----------|------------------|-----------------------|------------------|-----------------------|
| rs1534476  | 28833479 | 0.97(0.96, 0.98) | 3.07×10 <sup>-6</sup> | 0.97(0.95, 0.98) | 1.77×10 <sup>-6</sup> |
| rs1534478  | 28840691 | 0.97(0.96, 0.98) | 3.07×10 <sup>-6</sup> | 0.97(0.95, 0.98) | 1.77×10 <sup>-6</sup> |
| rs4530322  | 28852926 | 0.97(0.96, 0.98) | 3.07×10 <sup>-6</sup> | 0.97(0.95, 0.98) | 1.77×10 <sup>-6</sup> |
| rs6713845  | 28854570 | 0.97(0.96, 0.98) | 3.07×10 <sup>-6</sup> | 0.97(0.95, 0.98) | 1.77×10 <sup>-6</sup> |
| rs3752899  | 28856220 | 0.97(0.96, 0.98) | 3.07×10 <sup>-6</sup> | 0.97(0.95, 0.98) | 1.77×10 <sup>-6</sup> |
| rs6741437  | 28867201 | 0.97(0.96, 0.98) | 3.07×10 <sup>-6</sup> | 0.97(0.95, 0.98) | 1.77×10 <sup>-6</sup> |
| rs11678098 | 28876857 | 0.97(0.96, 0.98) | 3.07×10 <sup>-6</sup> | 0.97(0.95, 0.98) | 1.77×10 <sup>-6</sup> |
| rs10192375 | 28892116 | 0.97(0.96, 0.98) | 3.07×10 <sup>-6</sup> | 0.97(0.95, 0.98) | 1.77×10 <sup>-6</sup> |
| rs7586033  | 28892960 | 0.97(0.96, 0.98) | 3.07×10 <sup>-6</sup> | 0.97(0.95, 0.98) | 1.77×10 <sup>-6</sup> |
| rs4666115  | 28902004 | 0.97(0.96, 0.98) | 3.07×10 <sup>-6</sup> | 0.97(0.95, 0.98) | 1.77×10 <sup>-6</sup> |
| rs4372836  | 28973883 | 0.97(0.96, 0.98) | 3.07×10 <sup>-6</sup> | 0.97(0.95, 0.98) | 1.77×10 <sup>-6</sup> |
| rs3190     | 29025479 | 0.97(0.96, 0.98) | 3.07×10 <sup>-6</sup> | 0.97(0.95, 0.98) | 1.77×10 <sup>-6</sup> |
| rs12475612 | 29030006 | 0.97(0.96, 0.98) | 3.07×10 <sup>-6</sup> | 0.97(0.95, 0.98) | 1.77×10 <sup>-6</sup> |
| rs6547881  | 29032746 | 0.97(0.96, 0.98) | 3.07×10 <sup>-6</sup> | 0.97(0.95, 0.98) | 1.77×10 <sup>-6</sup> |
| rs6547892  | 29138009 | 0.97(0.96, 0.98) | 3.07×10 <sup>-6</sup> | 0.97(0.95, 0.98) | 1.77×10 <sup>-6</sup> |
| rs9653591  | 29145725 | 0.97(0.96, 0.98) | 3.07×10 <sup>-6</sup> | 0.97(0.95, 0.98) | 1.77×10 <sup>-6</sup> |
| rs3087649  | 29169612 | 0.97(0.96, 0.98) | 3.07×10 <sup>-6</sup> | 0.97(0.95, 0.98) | 1.77×10 <sup>-6</sup> |
| rs11680458 | 29170623 | 0.97(0.96, 0.98) | 3.07×10 <sup>-6</sup> | 0.97(0.95, 0.98) | 1.77×10 <sup>-6</sup> |
| rs10197378 | 29181107 | 0.97(0.96, 0.98) | 3.07×10 <sup>-6</sup> | 0.97(0.95, 0.98) | 1.77×10 <sup>-6</sup> |
| rs6727948  | 29184909 | 0.97(0.96, 0.98) | 3.07×10 <sup>-6</sup> | 0.97(0.95, 0.98) | 1.77×10 <sup>-6</sup> |
| rs4666157  | 29196785 | 0.97(0.96, 0.98) | 3.57×10 <sup>-6</sup> | 0.97(0.96, 0.98) | 8.46×10 <sup>-6</sup> |
| rs7578007  | 29215005 | 0.97(0.96, 0.98) | 3.57×10 <sup>-6</sup> | 0.97(0.96, 0.98) | 8.46×10 <sup>-6</sup> |
| rs12466400 | 29229806 | 0.97(0.96, 0.98) | 3.57×10 <sup>-6</sup> | 0.97(0.96, 0.98) | 8.46×10 <sup>-6</sup> |
| rs11684978 | 29231870 | 0.97(0.96, 0.98) | 3.57×10 <sup>-6</sup> | 0.97(0.96, 0.98) | 8.46×10 <sup>-6</sup> |
| rs13420380 | 29245933 | 0.97(0.96, 0.98) | 3.57×10 <sup>-6</sup> | 0.97(0.96, 0.98) | 8.46×10 <sup>-6</sup> |
| rs6739684  | 29247894 | 0.97(0.96, 0.98) | 3.57×10 <sup>-6</sup> | 0.97(0.96, 0.98) | 8.46×10 <sup>-6</sup> |
| rs13008323 | 29248046 | 0.97(0.96, 0.98) | 3.57×10 <sup>-6</sup> | 0.97(0.96, 0.98) | 8.46×10 <sup>-6</sup> |
| rs6742110  | 29260085 | 0.97(0.96, 0.98) | 3.57×10 <sup>-6</sup> | 0.97(0.96, 0.98) | 8.46×10 <sup>-6</sup> |
| rs2276551  | 29268375 | 0.97(0.96, 0.98) | 3.57×10 <sup>-6</sup> | 0.97(0.96, 0.98) | 8.46×10 <sup>-6</sup> |
| rs6547906  | 29272472 | 0.97(0.96, 0.98) | 3.57×10 <sup>-6</sup> | 0.97(0.96, 0.98) | 8.46×10 <sup>-6</sup> |
| rs6731719  | 29273719 | 0.97(0.96, 0.98) | 3.57×10 <sup>-6</sup> | 0.97(0.96, 0.98) | 8.46×10 <sup>-6</sup> |
| rs882631   | 29280791 | 0.97(0.96, 0.98) | 3.57×10 <sup>-6</sup> | 0.97(0.96, 0.98) | 8.46×10 <sup>-6</sup> |
| rs10196859 | 29287227 | 0.97(0.96, 0.98) | 3.57×10 <sup>-6</sup> | 0.97(0.96, 0.98) | 8.46×10 <sup>-6</sup> |
| rs17744052 | 29289411 | 0.97(0.96, 0.98) | 3.57×10 <sup>-6</sup> | 0.97(0.96, 0.98) | 8.46×10 <sup>-6</sup> |
| rs7569316  | 29289501 | 0.97(0.96, 0.98) | 3.57×10 <sup>-6</sup> | 0.97(0.96, 0.98) | 8.46×10 <sup>-6</sup> |
| rs7572957  | 29487405 | 0.97(0.95, 0.98) | 8.97×10 <sup>-8</sup> | 0.97(0.95, 0.98) | 4.63×10 <sup>-6</sup> |
| rs876748   | 29512675 | 0.96(0.95, 0.98) | 3.96×10 <sup>-8</sup> | 0.97(0.95, 0.98) | 3.45×10 <sup>-6</sup> |
| rs13406263 | 29519475 | 0.96(0.95, 0.98) | 3.96×10 <sup>-8</sup> | 0.97(0.95, 0.98) | 3.45×10 <sup>-6</sup> |
| rs6708752  | 29536039 | 0.96(0.95, 0.98) | 3.96×10 <sup>-8</sup> | 0.97(0.95, 0.98) | 3.45×10 <sup>-6</sup> |
| rs4666200  | 29538411 | 0.96(0.95, 0.98) | 3.96×10 <sup>-8</sup> | 0.97(0.95, 0.98) | 3.45×10 <sup>-6</sup> |
| rs12465220 | 29559519 | 0.96(0.95, 0.98) | 2.34×10 <sup>-8</sup> | 0.97(0.95, 0.98) | 2.72×10 <sup>-6</sup> |
| rs17007931 | 29578068 | 0.96(0.95, 0.98) | 2.34×10 <sup>-8</sup> | 0.97(0.95, 0.98) | 2.72×10 <sup>-6</sup> |
| rs12714277 | 29586686 | 0.96(0.95, 0.98) | 2.34×10 <sup>-8</sup> | 0.97(0.95, 0.98) | 2.72×10 <sup>-6</sup> |

|            |          |                  |                       |                  |                       |
|------------|----------|------------------|-----------------------|------------------|-----------------------|
| rs4633880  | 29605589 | 0.96(0.95, 0.98) | 2.34×10 <sup>-8</sup> | 0.97(0.95, 0.98) | 2.72×10 <sup>-6</sup> |
| rs7591913  | 29619971 | 0.96(0.95, 0.98) | 2.34×10 <sup>-8</sup> | 0.97(0.95, 0.98) | 2.72×10 <sup>-6</sup> |
| rs4233734  | 29637040 | 0.97(0.95, 0.98) | 7.96×10 <sup>-8</sup> | 0.97(0.96, 0.98) | 9.85×10 <sup>-6</sup> |
| rs4555301  | 29639679 | 0.97(0.95, 0.98) | 7.96×10 <sup>-8</sup> | 0.97(0.96, 0.98) | 9.85×10 <sup>-6</sup> |
| rs3923028  | 29685596 | 0.97(0.95, 0.98) | 7.96×10 <sup>-8</sup> | 0.97(0.96, 0.98) | 9.85×10 <sup>-6</sup> |
| rs11888731 | 29702883 | 0.97(0.95, 0.98) | 7.96×10 <sup>-8</sup> | 0.97(0.96, 0.98) | 9.85×10 <sup>-6</sup> |
| rs4528720  | 29704715 | 0.97(0.95, 0.98) | 7.96×10 <sup>-8</sup> | 0.97(0.96, 0.98) | 9.85×10 <sup>-6</sup> |
| rs13383564 | 29708619 | 0.97(0.95, 0.98) | 7.96×10 <sup>-8</sup> | 0.97(0.96, 0.98) | 9.85×10 <sup>-6</sup> |
| rs12714287 | 29710663 | 0.97(0.95, 0.98) | 7.96×10 <sup>-8</sup> | 0.97(0.96, 0.98) | 9.85×10 <sup>-6</sup> |
| rs13000666 | 29715388 | 0.97(0.95, 0.98) | 7.96×10 <sup>-8</sup> | 0.97(0.96, 0.98) | 9.85×10 <sup>-6</sup> |
| rs9808313  | 29721334 | 0.97(0.95, 0.98) | 7.96×10 <sup>-8</sup> | 0.97(0.96, 0.98) | 9.85×10 <sup>-6</sup> |
| rs10445906 | 29727204 | 0.97(0.95, 0.98) | 7.96×10 <sup>-8</sup> | 0.97(0.96, 0.98) | 9.85×10 <sup>-6</sup> |
| rs4433956  | 29730492 | 0.97(0.95, 0.98) | 7.96×10 <sup>-8</sup> | 0.97(0.96, 0.98) | 9.85×10 <sup>-6</sup> |
| rs4665463  | 29733601 | 0.97(0.95, 0.98) | 7.96×10 <sup>-8</sup> | 0.97(0.96, 0.98) | 9.85×10 <sup>-6</sup> |
| rs4666243  | 29763753 | 0.97(0.95, 0.98) | 7.96×10 <sup>-8</sup> | 0.97(0.96, 0.98) | 9.85×10 <sup>-6</sup> |
| rs10193521 | 29785679 | 0.97(0.95, 0.98) | 7.96×10 <sup>-8</sup> | 0.97(0.96, 0.98) | 9.85×10 <sup>-6</sup> |
| rs6547948  | 29790622 | 0.97(0.95, 0.98) | 7.96×10 <sup>-8</sup> | 0.97(0.96, 0.98) | 9.85×10 <sup>-6</sup> |

<sup>a</sup>Odds ratios (ORs) were estimated in a case-only study adjusting for age and sex.

<sup>b</sup>Odds ratios (ORs) were estimated in a case-control study adjusting for age and sex.

Supplementary Table S3. eQTL analyses for SNPs in known MM risk region and suggestive risk regions in AA MM.

| SNP        | Chr | Position | A1 | A2 | Gene   | TSS      | Beta  | SE   | P-value  |
|------------|-----|----------|----|----|--------|----------|-------|------|----------|
| rs7577599  | 2   | 25613146 | T  | C  | NCOA1  | 24807346 | 0.03  | 0.03 | 0.39     |
|            |     |          |    |    | PTRHD1 | 25016251 | -0.05 | 0.05 | 0.28     |
|            |     |          |    |    | ADCY3  | 25142055 | 0.04  | 0.05 | 0.45     |
|            |     |          |    |    | DNMT3A | 25564784 | 0.00  | 0.03 | 0.94     |
|            |     |          |    |    | ASXL2  | 26101312 | -0.02 | 0.02 | 0.38     |
|            |     |          |    |    | KIF3C  | 26205443 | -0.09 | 0.04 | 0.02     |
|            |     |          |    |    | RAB10  | 26256729 | 0.00  | 0.02 | 0.85     |
|            |     |          |    |    | HADHA  | 26467594 | 0.02  | 0.02 | 0.41     |
|            |     |          |    |    | HADHB  | 26467616 | 0.02  | 0.02 | 0.35     |
|            |     |          |    |    | EPT1   | 26568954 | 0.04  | 0.03 | 0.23     |
| rs6546148  | 2   | 25625005 | A  | G  | NCOA1  | 24807346 | 0.01  | 0.04 | 0.79     |
|            |     |          |    |    | PTRHD1 | 25016251 | -0.06 | 0.05 | 0.26     |
|            |     |          |    |    | ADCY3  | 25142055 | 0.02  | 0.05 | 0.74     |
|            |     |          |    |    | DNMT3A | 25564784 | 0.00  | 0.03 | 0.86     |
|            |     |          |    |    | ASXL2  | 26101312 | -0.01 | 0.02 | 0.60     |
|            |     |          |    |    | KIF3C  | 26205443 | -0.02 | 0.04 | 0.67     |
|            |     |          |    |    | RAB10  | 26256729 | 0.01  | 0.02 | 0.57     |
|            |     |          |    |    | HADHA  | 26467594 | 0.06  | 0.02 | 8.48E-03 |
|            |     |          |    |    | HADHB  | 26467616 | 0.04  | 0.02 | 0.12     |
|            |     |          |    |    | EPT1   | 26568954 | 0.04  | 0.03 | 0.27     |
| rs10180663 | 2   | 25633242 | T  | C  | NCOA1  | 24807346 | -0.02 | 0.03 | 0.57     |
|            |     |          |    |    | PTRHD1 | 25016251 | -0.02 | 0.05 | 0.72     |
|            |     |          |    |    | ADCY3  | 25142055 | 0.00  | 0.05 | 0.95     |
|            |     |          |    |    | DNMT3A | 25564784 | -0.01 | 0.03 | 0.75     |
|            |     |          |    |    | ASXL2  | 26101312 | 0.02  | 0.02 | 0.49     |
|            |     |          |    |    | KIF3C  | 26205443 | -0.03 | 0.04 | 0.52     |
|            |     |          |    |    | RAB10  | 26256729 | 0.02  | 0.02 | 0.47     |
|            |     |          |    |    | HADHA  | 26467594 | 0.06  | 0.02 | 5.19E-03 |
|            |     |          |    |    | HADHB  | 26467616 | 0.04  | 0.02 | 0.06     |
|            |     |          |    |    | EPT1   | 26568954 | 0.03  | 0.03 | 0.29     |
| rs6746082  | 2   | 25659244 | A  | C  | NCOA1  | 24807346 | -0.01 | 0.03 | 0.80     |
|            |     |          |    |    | PTRHD1 | 25016251 | -0.08 | 0.05 | 0.11     |
|            |     |          |    |    | ADCY3  | 25142055 | 0.02  | 0.04 | 0.73     |
|            |     |          |    |    | DNMT3A | 25564784 | 0.03  | 0.02 | 0.30     |
|            |     |          |    |    | ASXL2  | 26101312 | -0.02 | 0.02 | 0.46     |
|            |     |          |    |    | KIF3C  | 26205443 | -0.04 | 0.04 | 0.29     |
|            |     |          |    |    | RAB10  | 26256729 | -0.01 | 0.02 | 0.59     |
|            |     |          |    |    | HADHA  | 26467594 | 0.02  | 0.02 | 0.41     |
|            |     |          |    |    | HADHB  | 26467616 | 0.00  | 0.02 | 0.92     |
|            |     |          |    |    | EPT1   | 26568954 | 0.02  | 0.03 | 0.43     |

|            |   |           |   |   |        |           |       |      |          |
|------------|---|-----------|---|---|--------|-----------|-------|------|----------|
| rs4325816  | 2 | 174808899 | T | C | ZAK    | 173940565 | -0.02 | 0.05 | 0.67     |
|            |   |           |   |   | CDCA7  | 174219561 | 0.02  | 0.11 | 0.85     |
|            |   |           |   |   | SP3    | 174830430 | 0.07  | 0.02 | 5.47E-04 |
|            |   |           |   |   | OLA1   | 175113365 | 0.00  | 0.01 | 0.93     |
|            |   |           |   |   | CIR1   | 175260443 | -0.04 | 0.03 | 0.18     |
|            |   |           |   |   | SCRN3  | 175260457 | 0.03  | 0.03 | 0.28     |
|            |   |           |   |   | GPR155 | 175351816 | -0.09 | 0.08 | 0.26     |
| rs73828280 | 3 | 41833907  | A | T | WIPF1  | 175547627 | -0.02 | 0.03 | 0.53     |
|            |   |           |   |   | CTNNB1 | 41240942  | 0.00  | 0.03 | 0.97     |
|            |   |           |   |   | TRAK1  | 42132746  | 0.01  | 0.02 | 0.56     |
|            |   |           |   |   | SEC22C | 42623520  | -0.02 | 0.01 | 0.23     |
|            |   |           |   |   | SS18L2 | 42632298  | 0.00  | 0.02 | 0.89     |
| rs1052501  | 3 | 41925398  | C | T | NKTR   | 42642147  | 0.03  | 0.04 | 0.34     |
|            |   |           |   |   | CTNNB1 | 41240942  | 0.02  | 0.03 | 0.52     |
|            |   |           |   |   | TRAK1  | 42132746  | -0.02 | 0.02 | 0.24     |
|            |   |           |   |   | SEC22C | 42623520  | 0.03  | 0.01 | 0.03     |
|            |   |           |   |   | SS18L2 | 42632298  | -0.01 | 0.02 | 0.50     |
|            |   |           |   |   | NKTR   | 42642147  | -0.04 | 0.04 | 0.23     |
| rs12108049 | 3 | 41958161  | A | G | HIGD1A | 42845934  | -0.03 | 0.03 | 0.42     |
|            |   |           |   |   | CTNNB1 | 41240942  | 0.09  | 0.05 | 0.11     |
|            |   |           |   |   | TRAK1  | 42132746  | 0.02  | 0.03 | 0.45     |
|            |   |           |   |   | SEC22C | 42623520  | -0.04 | 0.02 | 0.07     |
|            |   |           |   |   | SS18L2 | 42632298  | -0.02 | 0.03 | 0.50     |
|            |   |           |   |   | NKTR   | 42642147  | 0.02  | 0.06 | 0.70     |
| rs6599192  | 3 | 41992408  | G | A | HIGD1A | 42845934  | -0.07 | 0.06 | 0.19     |
|            |   |           |   |   | CTNNB1 | 41240942  | 0.03  | 0.03 | 0.37     |
|            |   |           |   |   | TRAK1  | 42132746  | -0.01 | 0.02 | 0.55     |
|            |   |           |   |   | SEC22C | 42623520  | 0.03  | 0.01 | 0.04     |
|            |   |           |   |   | SS18L2 | 42632298  | -0.02 | 0.02 | 0.37     |
|            |   |           |   |   | NKTR   | 42642147  | -0.06 | 0.04 | 0.10     |
| rs10936599 | 3 | 169492101 | C | T | HIGD1A | 42845934  | -0.04 | 0.03 | 0.22     |
|            |   |           |   |   | MYNN   | 169492053 | 0.05  | 0.05 | 0.33     |
|            |   |           |   |   | LRRC34 | 169530574 | -0.34 | 0.14 | 0.02     |
|            |   |           |   |   | SEC62  | 169684580 | 0.04  | 0.05 | 0.39     |
|            |   |           |   |   | GPR160 | 169755735 | -0.10 | 0.12 | 0.39     |
|            |   |           |   |   | PHC3   | 169899537 | -0.06 | 0.05 | 0.18     |
| rs10936600 | 3 | 169514585 | A | T | PRKCI  | 169940220 | -0.01 | 0.07 | 0.85     |
|            |   |           |   |   | SKIL   | 170075473 | 0.11  | 0.07 | 0.11     |
|            |   |           |   |   | MYNN   | 169492053 | -0.03 | 0.04 | 0.44     |
|            |   |           |   |   | LRRC34 | 169530574 | -0.03 | 0.12 | 0.81     |
|            |   |           |   |   | SEC62  | 169684580 | -0.04 | 0.04 | 0.35     |
|            |   |           |   |   | GPR160 | 169755735 | -0.11 | 0.10 | 0.27     |
|            |   |           |   |   | PHC3   | 169899537 | -0.07 | 0.04 | 0.09     |

|            |   |           |   |   |          |           |       |      |          |
|------------|---|-----------|---|---|----------|-----------|-------|------|----------|
|            |   |           |   |   | PRKCI    | 169940220 | -0.05 | 0.06 | 0.46     |
|            |   |           |   |   | SKIL     | 170075473 | 0.12  | 0.06 | 0.04     |
| rs9290375  | 3 | 169566090 | A | G | MYNN     | 169492053 | 0.00  | 0.02 | 0.97     |
|            |   |           |   |   | LRRC34   | 169530574 | 0.12  | 0.07 | 0.11     |
|            |   |           |   |   | SEC62    | 169684580 | 0.06  | 0.02 | 0.02     |
|            |   |           |   |   | GPR160   | 169755735 | 0.17  | 0.06 | 0.005    |
|            |   |           |   |   | PHC3     | 169899537 | 0.01  | 0.02 | 0.75     |
|            |   |           |   |   | PRKCI    | 169940220 | 0.07  | 0.04 | 0.08     |
| rs56219066 | 5 | 95242931  | T | C | MCTP1    | 94620279  | 0.03  | 0.08 | 0.68     |
|            |   |           |   |   | TTC37    | 94890709  | 0.04  | 0.03 | 0.14     |
|            |   |           |   |   | ARSK     | 94890825  | -0.08 | 0.06 | 0.19     |
|            |   |           |   |   | RFESD    | 94982583  | -0.04 | 0.05 | 0.44     |
|            |   |           |   |   | RHOBTB3  | 95066850  | -0.05 | 0.07 | 0.44     |
|            |   |           |   |   | GLRX     | 95158577  | -0.04 | 0.03 | 0.16     |
|            |   |           |   |   | ELL2     | 95297775  | -0.26 | 0.04 | 5.09E-12 |
|            |   |           |   |   | CAST     | 96038493  | -0.03 | 0.02 | 0.18     |
|            |   |           |   |   | ERAP1    | 96149848  | 0.01  | 0.03 | 0.64     |
|            |   |           |   |   | ERAP2    | 96211644  | 0.13  | 0.15 | 0.38     |
| rs1423269  | 5 | 95255724  | A | G | MCTP1    | 94620279  | 0.06  | 0.08 | 0.51     |
|            |   |           |   |   | TTC37    | 94890709  | 0.03  | 0.03 | 0.19     |
|            |   |           |   |   | ARSK     | 94890825  | -0.08 | 0.06 | 0.19     |
|            |   |           |   |   | RFESD    | 94982583  | 0.01  | 0.05 | 0.89     |
|            |   |           |   |   | RHOBTB3  | 95066850  | -0.10 | 0.07 | 0.16     |
|            |   |           |   |   | GLRX     | 95158577  | -0.06 | 0.03 | 0.03     |
|            |   |           |   |   | ELL2     | 95297775  | -0.27 | 0.04 | 3.77E-13 |
|            |   |           |   |   | CAST     | 96038493  | 0.00  | 0.02 | 0.99     |
|            |   |           |   |   | ERAP1    | 96149848  | 0.01  | 0.03 | 0.84     |
|            |   |           |   |   | ERAP2    | 96211644  | 0.17  | 0.15 | 0.28     |
| rs6595443  | 5 | 122743325 | A | T | SNX2     | 122110750 | -0.01 | 0.02 | 0.63     |
|            |   |           |   |   | SNX24    | 122181160 | 0.07  | 0.05 | 0.15     |
|            |   |           |   |   | PPIC     | 122372425 | -0.13 | 0.12 | 0.27     |
|            |   |           |   |   | CEP120   | 122759286 | 0.02  | 0.03 | 0.53     |
|            |   |           |   |   | CSNK1G3  | 122881111 | 0.01  | 0.02 | 0.64     |
| rs34229995 | 6 | 15244018  | C | G | JARID2   | 15246206  | -0.19 | 0.15 | 0.19     |
|            |   |           |   |   | DTNBP1   | 15663289  | 0.13  | 0.09 | 0.18     |
|            |   |           |   |   | MYLIP    | 16129317  | 0.26  | 0.34 | 0.45     |
|            |   |           |   |   | GMPR     | 16238811  | 0.08  | 0.36 | 0.83     |
| rs2285803  | 6 | 31107258  | T | C | TRIM26   | 30181271  | -0.04 | 0.04 | 0.32     |
|            |   |           |   |   | TRIM39   | 30294621  | 0.00  | 0.04 | 0.91     |
|            |   |           |   |   | C6orf136 | 30614816  | -0.03 | 0.04 | 0.37     |
|            |   |           |   |   | NRM      | 30659197  | -0.03 | 0.05 | 0.60     |
|            |   |           |   |   | TUBB     | 30688157  | 0.03  | 0.04 | 0.52     |
|            |   |           |   |   | FLOT1    | 30710453  | -0.01 | 0.03 | 0.67     |



|           |   |          |   |        |          |          |       |      |      |
|-----------|---|----------|---|--------|----------|----------|-------|------|------|
|           |   |          |   | DDR1   | 30852327 | 0.02     | 0.04  | 0.70 |      |
|           |   |          |   | GTF2H4 | 30875977 | -0.05    | 0.04  | 0.23 |      |
|           |   |          |   | VARS2  | 30881982 | 0.01     | 0.03  | 0.77 |      |
|           |   |          |   | CCHCR1 | 31125566 | 0.02     | 0.02  | 0.42 |      |
|           |   |          |   | HCG27  | 31165537 | 0.05     | 0.04  | 0.19 |      |
|           |   |          |   | HLA-B  | 31324989 | -0.01    | 0.03  | 0.64 |      |
|           |   |          |   | HCG26  | 31439006 | 0.10     | 0.10  | 0.31 |      |
|           |   |          |   | MICB   | 31465855 | -0.03    | 0.04  | 0.44 |      |
|           |   |          |   | PRRC2A | 31588450 | -0.02    | 0.04  | 0.67 |      |
|           |   |          |   | CSNK2B | 31633657 | -0.01    | 0.02  | 0.47 |      |
|           |   |          |   | GPANK1 | 31634060 | -0.02    | 0.02  | 0.47 |      |
|           |   |          |   | CLIC1  | 31704341 | 0.01     | 0.02  | 0.59 |      |
|           |   |          |   | LSM2   | 31774761 | -0.05    | 0.04  | 0.15 |      |
|           |   |          |   | HSPA1B | 31795512 | -0.11    | 0.13  | 0.40 |      |
|           |   |          |   | NELFE  | 31926864 | 0.00     | 0.02  | 0.86 |      |
|           |   |          |   | FKBPL  | 32098067 | 0.00     | 0.02  | 0.96 |      |
| rs3132535 | 6 | 31116526 | A | G      | TRIM26   | 30181271 | -0.05 | 0.04 | 0.22 |
|           |   |          |   |        | TRIM39   | 30294621 | -0.01 | 0.04 | 0.85 |
|           |   |          |   |        | C6orf136 | 30614816 | -0.07 | 0.04 | 0.06 |
|           |   |          |   |        | NRM      | 30659197 | -0.04 | 0.05 | 0.49 |
|           |   |          |   |        | TUBB     | 30688157 | 0.03  | 0.04 | 0.54 |
|           |   |          |   |        | FLOT1    | 30710453 | 0.00  | 0.03 | 0.91 |
|           |   |          |   |        | DDR1     | 30852327 | 0.03  | 0.04 | 0.56 |
|           |   |          |   |        | GTF2H4   | 30875977 | -0.06 | 0.04 | 0.14 |
|           |   |          |   |        | VARS2    | 30881982 | 0.03  | 0.03 | 0.38 |
|           |   |          |   |        | CCHCR1   | 31125566 | 0.01  | 0.02 | 0.61 |
|           |   |          |   |        | HCG27    | 31165537 | 0.05  | 0.04 | 0.23 |
|           |   |          |   |        | HLA-B    | 31324989 | 0.01  | 0.03 | 0.76 |
|           |   |          |   |        | HCG26    | 31439006 | 0.09  | 0.10 | 0.36 |
|           |   |          |   |        | MICB     | 31465855 | -0.03 | 0.04 | 0.41 |
|           |   |          |   |        | PRRC2A   | 31588450 | -0.02 | 0.04 | 0.66 |
|           |   |          |   |        | CSNK2B   | 31633657 | -0.01 | 0.02 | 0.62 |
|           |   |          |   |        | GPANK1   | 31634060 | 0.00  | 0.02 | 0.84 |
|           |   |          |   |        | CLIC1    | 31704341 | 0.02  | 0.02 | 0.38 |
|           |   |          |   |        | LSM2     | 31774761 | -0.07 | 0.04 | 0.05 |
|           |   |          |   |        | HSPA1B   | 31795512 | -0.11 | 0.13 | 0.41 |
|           |   |          |   |        | NELFE    | 31926864 | 0.01  | 0.02 | 0.72 |
|           |   |          |   |        | FKBPL    | 32098067 | 0.00  | 0.02 | 0.94 |
| rs879882  | 6 | 31139452 | T | C      | TRIM26   | 30181271 | 0.06  | 0.04 | 0.11 |
|           |   |          |   |        | TRIM39   | 30294621 | 0.05  | 0.03 | 0.16 |
|           |   |          |   |        | C6orf136 | 30614816 | -0.01 | 0.03 | 0.75 |
|           |   |          |   |        | NRM      | 30659197 | 0.02  | 0.05 | 0.76 |
|           |   |          |   |        | TUBB     | 30688157 | 0.04  | 0.04 | 0.37 |

|            |   |           |   |   |           |           |       |      |      |
|------------|---|-----------|---|---|-----------|-----------|-------|------|------|
|            |   |           |   |   | FLOT1     | 30710453  | 0.02  | 0.03 | 0.54 |
|            |   |           |   |   | DDR1      | 30852327  | 0.00  | 0.04 | 0.95 |
|            |   |           |   |   | GTF2H4    | 30875977  | 0.02  | 0.04 | 0.57 |
|            |   |           |   |   | VARS2     | 30881982  | 0.07  | 0.03 | 0.02 |
|            |   |           |   |   | CCHCR1    | 31125566  | 0.02  | 0.02 | 0.32 |
|            |   |           |   |   | HCG27     | 31165537  | -0.08 | 0.04 | 0.05 |
|            |   |           |   |   | HLA-B     | 31324989  | -0.01 | 0.02 | 0.69 |
|            |   |           |   |   | HCG26     | 31439006  | -0.03 | 0.09 | 0.73 |
|            |   |           |   |   | MICB      | 31465855  | 0.06  | 0.04 | 0.11 |
|            |   |           |   |   | PRRC2A    | 31588450  | -0.01 | 0.04 | 0.74 |
|            |   |           |   |   | CSNK2B    | 31633657  | -0.02 | 0.02 | 0.39 |
|            |   |           |   |   | GPANK1    | 31634060  | 0.02  | 0.02 | 0.31 |
|            |   |           |   |   | CLIC1     | 31704341  | 0.02  | 0.02 | 0.45 |
|            |   |           |   |   | LSM2      | 31774761  | -0.03 | 0.03 | 0.41 |
|            |   |           |   |   | HSPA1B    | 31795512  | 0.18  | 0.13 | 0.16 |
|            |   |           |   |   | NELFE     | 31926864  | 0.00  | 0.02 | 0.94 |
|            |   |           |   |   | FKBPL     | 32098067  | 0.00  | 0.02 | 0.99 |
|            |   |           |   |   | PPT2      | 32121229  | 0.06  | 0.04 | 0.09 |
| rs9372120  | 6 | 106667535 | T | G | PREP      | 105850999 | -0.04 | 0.03 | 0.20 |
|            |   |           |   |   | PRDM1     | 106546737 | 0.00  | 0.05 | 0.97 |
|            |   |           |   |   | ATG5      | 106773695 | 0.05  | 0.06 | 0.39 |
|            |   |           |   |   | AIM1      | 106959730 | 0.08  | 0.16 | 0.63 |
|            |   |           |   |   | RTN4IP1   | 107077373 | -0.24 | 0.10 | 0.01 |
|            |   |           |   |   | QRSL1     | 107077441 | 0.03  | 0.08 | 0.67 |
|            |   |           |   |   | C6orf203  | 107349407 | -0.02 | 0.06 | 0.75 |
|            |   |           |   |   | BEND3     | 107435636 | 0.04  | 0.07 | 0.55 |
| rs4487645  | 7 | 21938240  | C | A | SP4       | 21467689  | 0.06  | 0.03 | 0.03 |
|            |   |           |   |   | CDCA7L    | 21985542  | 0.18  | 0.10 | 0.07 |
|            |   |           |   |   | RAPGEF5   | 22396533  | -0.01 | 0.18 | 0.96 |
|            |   |           |   |   | STEAP1B   | 22539901  | 0.06  | 0.15 | 0.69 |
|            |   |           |   |   | IL6       | 22766766  | -0.07 | 0.14 | 0.65 |
|            |   |           |   |   | TOMM7     | 22862421  | -0.06 | 0.04 | 0.18 |
| rs17507636 | 7 | 106291118 | C | T | SYPL1     | 105752791 | 0.35  | 0.16 | 0.03 |
|            |   |           |   |   | NAMPT     | 105925638 | 0.06  | 0.11 | 0.57 |
|            |   |           |   |   | CCDC71L   | 106301634 | 0.12  | 0.05 | 0.03 |
|            |   |           |   |   | PIK3CG    | 106505924 | -0.02 | 0.10 | 0.80 |
|            |   |           |   |   | PRKAR2B   | 106685178 | -0.01 | 0.18 | 0.97 |
|            |   |           |   |   | HBP1      | 106809460 | 0.05  | 0.04 | 0.23 |
|            |   |           |   |   | DUS4L     | 107204402 | 0.05  | 0.04 | 0.20 |
|            |   |           |   |   | COG5      | 107204959 | 0.09  | 0.04 | 0.02 |
|            |   |           |   |   | BCAP29    | 107220422 | -0.02 | 0.05 | 0.66 |
| rs58618031 | 7 | 124583896 | T | C | GPR37     | 124405681 | -0.02 | 0.06 | 0.67 |
|            |   |           |   |   | LOC154872 | 124430864 | 0.00  | 0.06 | 0.94 |

|            |           |           |      |      |            |           |       |      |      |
|------------|-----------|-----------|------|------|------------|-----------|-------|------|------|
| rs61068276 | 7         | 124804887 | C    | T    | POT1       | 124570037 | -0.02 | 0.04 | 0.63 |
|            |           |           |      |      | GPR37      | 124405681 | -0.07 | 0.05 | 0.17 |
|            |           |           |      |      | LOC154872  | 124430864 | 0.02  | 0.05 | 0.71 |
| rs92903    | 7         | 124452670 | C    | T    | POT1       | 124570037 | 0.02  | 0.03 | 0.61 |
|            |           |           |      |      | GPR37      | 124405681 | -0.05 | 0.05 | 0.30 |
|            |           |           |      |      | LOC154872  | 124430864 | 0.02  | 0.05 | 0.77 |
| rs73169662 | 7         | 150922306 | T    | C    | POT1       | 124570037 | -0.01 | 0.04 | 0.73 |
|            |           |           |      |      | LRR61      | 150020296 | 0.04  | 0.07 | 0.54 |
|            |           |           |      |      | ACTR3C     | 150020758 | -0.21 | 0.17 | 0.22 |
|            |           |           |      |      | ZBED6CL    | 150026938 | -0.01 | 0.12 | 0.91 |
|            |           |           |      |      | RARRES2    | 150038763 | 0.05  | 0.12 | 0.71 |
|            |           |           |      |      | REPIN1     | 150065879 | 0.00  | 0.05 | 0.95 |
|            |           |           |      |      | ZNF775     | 150076406 | 0.03  | 0.06 | 0.62 |
|            |           |           |      |      | LINC00996  | 150130742 | -0.18 | 0.35 | 0.60 |
|            |           |           |      |      | GIMAP7     | 150211945 | -0.24 | 0.22 | 0.28 |
|            |           |           |      |      | GIMAP4     | 150264458 | 0.02  | 0.11 | 0.83 |
|            |           |           |      |      | GIMAP6     | 150329736 | 0.07  | 0.13 | 0.60 |
|            |           |           |      |      | GIMAP2     | 150382794 | -0.10 | 0.17 | 0.56 |
|            |           |           |      |      | TMEM176B   | 150497621 | -0.34 | 0.30 | 0.25 |
|            |           |           |      |      | TMEM176A   | 150497854 | -0.07 | 0.24 | 0.77 |
|            |           |           |      |      | AOC1       | 150549573 | -0.30 | 0.28 | 0.29 |
|            |           |           |      |      | KCNH2      | 150675402 | 0.10  | 0.16 | 0.53 |
|            |           |           |      |      | CDK5       | 150755052 | -0.13 | 0.12 | 0.26 |
|            |           |           |      |      | SLC4A2     | 150759634 | -0.17 | 0.11 | 0.12 |
|            |           |           |      |      | FASTK      | 150777970 | 0.03  | 0.05 | 0.56 |
|            |           |           |      |      | TMUB1      | 150780413 | 0.08  | 0.08 | 0.31 |
|            |           |           |      |      | ABCF2      | 150924317 | -0.02 | 0.05 | 0.60 |
| CHPF2      | 150929585 | 0.05      | 0.07 | 0.48 |            |           |       |      |      |
| NUB1       | 151038847 | 0.11      | 0.24 | 0.66 |            |           |       |      |      |
| RHEB       | 151217010 | -0.04     | 0.04 | 0.23 |            |           |       |      |      |
| rs7781265  | 7         | 150950940 | G    | A    | PRKAG2-AS1 | 151574127 | 0.08  | 0.18 | 0.67 |
|            |           |           |      |      | PRKAG2     | 151574316 | 0.05  | 0.13 | 0.71 |
|            |           |           |      |      | GALNT11    | 151722778 | -0.15 | 0.24 | 0.52 |
|            |           |           |      |      | LRR61      | 150020296 | -0.04 | 0.03 | 0.24 |
|            |           |           |      |      | ACTR3C     | 150020758 | -0.18 | 0.08 | 0.03 |
|            |           |           |      |      | ZBED6CL    | 150026938 | 0.07  | 0.05 | 0.21 |
|            |           |           |      |      | RARRES2    | 150038763 | -0.03 | 0.06 | 0.62 |
|            |           |           |      |      | REPIN1     | 150065879 | -0.04 | 0.02 | 0.11 |
|            |           |           |      |      | ZNF775     | 150076406 | 0.05  | 0.03 | 0.07 |
|            |           |           |      |      | LINC00996  | 150130742 | 0.21  | 0.16 | 0.20 |
| GIMAP7     | 150211945 | 0.01      | 0.10 | 0.95 |            |           |       |      |      |
| GIMAP4     | 150264458 | -0.03     | 0.05 | 0.49 |            |           |       |      |      |
| GIMAP6     | 150329736 | 0.06      | 0.06 | 0.31 |            |           |       |      |      |

|            |    |           |   |   |            |           |       |      |          |
|------------|----|-----------|---|---|------------|-----------|-------|------|----------|
|            |    |           |   |   | GIMAP2     | 150382794 | -0.02 | 0.08 | 0.84     |
|            |    |           |   |   | TMEM176B   | 150497621 | 0.23  | 0.14 | 0.10     |
|            |    |           |   |   | TMEM176A   | 150497854 | 0.15  | 0.11 | 0.19     |
|            |    |           |   |   | AOC1       | 150549573 | 0.13  | 0.13 | 0.31     |
|            |    |           |   |   | KCNH2      | 150675402 | 0.03  | 0.08 | 0.71     |
|            |    |           |   |   | CDK5       | 150755052 | -0.05 | 0.06 | 0.35     |
|            |    |           |   |   | SLC4A2     | 150759634 | -0.06 | 0.05 | 0.25     |
|            |    |           |   |   | FASTK      | 150777970 | -0.02 | 0.02 | 0.40     |
|            |    |           |   |   | TMUB1      | 150780413 | 0.02  | 0.04 | 0.64     |
|            |    |           |   |   | ABCF2      | 150924317 | 0.02  | 0.02 | 0.31     |
|            |    |           |   |   | CHPF2      | 150929585 | 0.01  | 0.03 | 0.76     |
|            |    |           |   |   | NUB1       | 151038847 | 0.04  | 0.11 | 0.74     |
|            |    |           |   |   | RHEB       | 151217010 | -0.01 | 0.02 | 0.41     |
|            |    |           |   |   | PRKAG2-AS1 | 151574127 | -0.16 | 0.08 | 0.05     |
|            |    |           |   |   | PRKAG2     | 151574316 | -0.03 | 0.06 | 0.58     |
|            |    |           |   |   | GALNT11    | 151722778 | -0.13 | 0.11 | 0.26     |
| rs1948915  | 8  | 128222421 | T | C | FAM84B     | 127570711 | 0.09  | 0.06 | 0.12     |
|            |    |           |   |   | MYC        | 128748315 | -0.37 | 0.13 | 5.92E-03 |
|            |    |           |   |   | PVT1       | 128902874 | -0.10 | 0.10 | 0.34     |
| rs13296848 | 9  | 701529    | T | C | C9orf66    | 215893    | -0.07 | 0.05 | 0.20     |
|            |    |           |   |   | DOCK8      | 273048    | -0.01 | 0.04 | 0.70     |
|            |    |           |   |   | KANK1      | 706806    | -0.07 | 0.04 | 0.12     |
|            |    |           |   |   | DMRT2      | 1050354   | -0.04 | 0.19 | 0.82     |
| rs2811710  | 9  | 21991923  | C | T | PTPLAD2    | 21031635  | -0.02 | 0.14 | 0.91     |
|            |    |           |   |   | KLHL9      | 21335429  | 0.01  | 0.03 | 0.77     |
|            |    |           |   |   | MTAP       | 21802635  | 0.01  | 0.03 | 0.86     |
|            |    |           |   |   | CDKN2A     | 21994490  | -0.03 | 0.02 | 0.17     |
|            |    |           |   |   | ZBTB5      | 37465407  | -0.03 | 0.05 | 0.51     |
|            |    |           |   |   | POLR1E     | 37485945  | 0.06  | 0.05 | 0.24     |
|            |    |           |   |   | TOMM5      | 37592636  | 0.00  | 0.03 | 0.95     |
|            |    |           |   |   | EXOSC3     | 37785089  | 0.06  | 0.03 | 0.05     |
|            |    |           |   |   | DCAF10     | 37800790  | 0.03  | 0.04 | 0.45     |
|            |    |           |   |   | SLC25A51   | 37904350  | 0.03  | 0.05 | 0.58     |
|            |    |           |   |   | ALDH1B1    | 38392661  | 0.11  | 0.07 | 0.12     |
| rs7034061  | 9  | 38443792  | G | T | ZBTB5      | 37465407  | -0.03 | 0.05 | 0.51     |
|            |    |           |   |   | POLR1E     | 37485945  | 0.06  | 0.05 | 0.24     |
|            |    |           |   |   | TOMM5      | 37592636  | 0.00  | 0.03 | 0.95     |
|            |    |           |   |   | EXOSC3     | 37785089  | 0.06  | 0.03 | 0.05     |
|            |    |           |   |   | DCAF10     | 37800790  | 0.03  | 0.04 | 0.45     |
|            |    |           |   |   | SLC25A51   | 37904350  | 0.03  | 0.05 | 0.58     |
|            |    |           |   |   | ALDH1B1    | 38392661  | 0.11  | 0.07 | 0.12     |
| rs2790457  | 10 | 28856819  | G | A | MKX        | 28034778  | 0.06  | 0.14 | 0.66     |

|            |    |          |   |   |          |          |       |      |          |
|------------|----|----------|---|---|----------|----------|-------|------|----------|
|            |    |          |   |   | WAC      | 28821422 | -0.11 | 0.02 | 2.29E-11 |
|            |    |          |   |   | BAMBI    | 28966424 | 0.09  | 0.12 | 0.47     |
|            |    |          |   |   | PTCHD3P1 | 29698501 | 0.03  | 0.04 | 0.44     |
| rs2102616  | 12 | 39654659 | C | T | ALG10B   | 38710557 | -0.05 | 0.07 | 0.49     |
|            |    |          |   |   | CPNE8    | 39299420 | -0.02 | 0.09 | 0.81     |
|            |    |          |   |   | KIF21A   | 39837192 | 0.01  | 0.08 | 0.87     |
|            |    |          |   |   | ABCD2    | 40013843 | 0.09  | 0.10 | 0.38     |
|            |    |          |   |   | SLC2A13  | 40499661 | 0.02  | 0.04 | 0.74     |
|            |    |          |   |   | LRRK2    | 40618813 | -0.15 | 0.18 | 0.40     |
| rs13338946 | 16 | 30700858 | T | C | C16orf54 | 29757340 | 0.08  | 0.06 | 0.24     |
|            |    |          |   |   | ZG16     | 29789561 | -0.04 | 0.04 | 0.34     |
|            |    |          |   |   | KIF22    | 29802034 | 0.00  | 0.02 | 0.96     |
|            |    |          |   |   | MAZ      | 29817855 | 0.02  | 0.03 | 0.53     |
|            |    |          |   |   | PAGR1    | 29827528 | -0.03 | 0.02 | 0.20     |
|            |    |          |   |   | MVP      | 29831715 | 0.01  | 0.04 | 0.86     |
|            |    |          |   |   | CDIPT    | 29874578 | 0.03  | 0.03 | 0.35     |
|            |    |          |   |   | KCTD13   | 29937545 | 0.01  | 0.02 | 0.81     |
|            |    |          |   |   | TMEM219  | 29973351 | -0.01 | 0.03 | 0.74     |
|            |    |          |   |   | HIRIP3   | 30007417 | 0.03  | 0.02 | 0.13     |
|            |    |          |   |   | INO80E   | 30007531 | 0.03  | 0.04 | 0.45     |
|            |    |          |   |   | FAM57B   | 30042186 | 0.00  | 0.02 | 0.91     |
|            |    |          |   |   | ALDOA    | 30064411 | 0.01  | 0.02 | 0.46     |
|            |    |          |   |   | PPP4C    | 30087384 | -0.03 | 0.04 | 0.52     |
|            |    |          |   |   | YPEL3    | 30107521 | 0.00  | 0.04 | 0.92     |
|            |    |          |   |   | MAPK3    | 30134630 | 0.01  | 0.03 | 0.71     |
|            |    |          |   |   | CORO1A   | 30194731 | 0.00  | 0.07 | 1.00     |
|            |    |          |   |   | CD2BP2   | 30366682 | 0.03  | 0.02 | 0.13     |
|            |    |          |   |   | TBC1D10B | 30381522 | -0.04 | 0.04 | 0.37     |
|            |    |          |   |   | SEPT1    | 30394171 | 0.06  | 0.06 | 0.29     |
|            |    |          |   |   | ZNF48    | 30406740 | -0.03 | 0.03 | 0.27     |
|            |    |          |   |   | DCTPP1   | 30441373 | -0.01 | 0.02 | 0.81     |
|            |    |          |   |   | SEPHS2   | 30457224 | 0.00  | 0.02 | 0.97     |
|            |    |          |   |   | ITGAL    | 30483983 | -0.17 | 0.07 | 0.02     |
|            |    |          |   |   | ZNF768   | 30537910 | -0.05 | 0.03 | 0.14     |
|            |    |          |   |   | ZNF747   | 30546194 | -0.07 | 0.06 | 0.24     |
|            |    |          |   |   | ZNF764   | 30569642 | -0.01 | 0.04 | 0.74     |
|            |    |          |   |   | ZNF785   | 30597092 | 0.05  | 0.05 | 0.30     |
|            |    |          |   |   | ZNF689   | 30621682 | 0.08  | 0.04 | 0.03     |
|            |    |          |   |   | PRR14    | 30662241 | 0.03  | 0.02 | 0.19     |
|            |    |          |   |   | FBRS     | 30675778 | -0.01 | 0.02 | 0.66     |
|            |    |          |   |   | C16orf93 | 30773565 | -0.01 | 0.03 | 0.72     |
|            |    |          |   |   | ZNF629   | 30798523 | -0.02 | 0.02 | 0.51     |
|            |    |          |   |   | BCL7C    | 30905399 | -0.08 | 0.04 | 0.05     |

|            |    |          |   |   |             |          |       |      |          |
|------------|----|----------|---|---|-------------|----------|-------|------|----------|
|            |    |          |   |   | ORAI3       | 30960405 | 0.03  | 0.03 | 0.31     |
|            |    |          |   |   | STX4        | 31044903 | 0.00  | 0.04 | 0.90     |
|            |    |          |   |   | VKORC1      | 31106276 | 0.00  | 0.03 | 0.96     |
|            |    |          |   |   | BCKDK       | 31119662 | 0.00  | 0.02 | 0.95     |
|            |    |          |   |   | FUS         | 31191431 | 0.00  | 0.03 | 0.94     |
|            |    |          |   |   | PYCARD      | 31214097 | 0.02  | 0.07 | 0.77     |
|            |    |          |   |   | ITGAM       | 31271288 | -0.07 | 0.09 | 0.42     |
|            |    |          |   |   | ARMC5       | 31470317 | 0.01  | 0.02 | 0.80     |
|            |    |          |   |   | SLC5A2      | 31494439 | 0.01  | 0.01 | 0.44     |
|            |    |          |   |   | C16orf58    | 31519706 | 0.06  | 0.03 | 0.03     |
|            |    |          |   |   | AHSP        | 31539203 | 0.12  | 0.10 | 0.24     |
| rs7193541  | 16 | 74664743 | T | C | PSMD7       | 74330673 | 0.03  | 0.03 | 0.20     |
|            |    |          |   |   | GLG1        | 74641042 | -0.01 | 0.02 | 0.64     |
|            |    |          |   |   | RFWD3       | 74700779 | 0.11  | 0.04 | 5.81E-03 |
|            |    |          |   |   | MLKL        | 74734789 | 0.07  | 0.07 | 0.31     |
|            |    |          |   |   | ZFP1        | 75182421 | 0.02  | 0.05 | 0.68     |
|            |    |          |   |   | CTRB2       | 75241072 | -0.05 | 0.11 | 0.64     |
|            |    |          |   |   | BCAR1       | 75301951 | -0.02 | 0.02 | 0.48     |
|            |    |          |   |   | CFDP1       | 75467387 | 0.03  | 0.04 | 0.39     |
|            |    |          |   |   | TMEM170A    | 75498584 | 0.04  | 0.04 | 0.31     |
|            |    |          |   |   | TMEM231     | 75590170 | 0.02  | 0.05 | 0.66     |
|            |    |          |   |   | GABARAPL2   | 75600249 | 0.01  | 0.02 | 0.56     |
|            |    |          |   |   | ADAT1       | 75657221 | 0.00  | 0.05 | 0.99     |
| rs34562254 | 17 | 16842991 | G | A | TTC19       | 15902694 | 0.00  | 0.06 | 0.94     |
|            |    |          |   |   | ZSWIM7      | 15903006 | -0.02 | 0.05 | 0.60     |
|            |    |          |   |   | NCOR1       | 16118874 | 0.00  | 0.03 | 0.90     |
|            |    |          |   |   | CENPV       | 16256812 | -0.07 | 0.09 | 0.40     |
|            |    |          |   |   | UBB         | 16284367 | 0.01  | 0.04 | 0.70     |
|            |    |          |   |   | TRPV2       | 16318856 | 0.05  | 0.05 | 0.27     |
|            |    |          |   |   | LRRC75A-AS1 | 16342301 | 0.02  | 0.03 | 0.38     |
|            |    |          |   |   | ZNF624      | 16557167 | 0.04  | 0.05 | 0.44     |
|            |    |          |   |   | TNFRSF13B   | 16875402 | 0.01  | 0.11 | 0.90     |
|            |    |          |   |   | PLD6        | 17109646 | 0.18  | 0.14 | 0.18     |
|            |    |          |   |   | COPS3       | 17184617 | 0.03  | 0.04 | 0.54     |
|            |    |          |   |   | RASD1       | 17399709 | 0.04  | 0.10 | 0.69     |
|            |    |          |   |   | PEMT        | 17495017 | -0.03 | 0.06 | 0.60     |
|            |    |          |   |   | RAI1        | 17584787 | -0.02 | 0.02 | 0.35     |
| rs4273077  | 17 | 16849139 | A | G | TTC19       | 15902694 | 0.09  | 0.05 | 0.09     |
|            |    |          |   |   | ZSWIM7      | 15903006 | -0.01 | 0.04 | 0.86     |
|            |    |          |   |   | NCOR1       | 16118874 | 0.03  | 0.03 | 0.30     |
|            |    |          |   |   | CENPV       | 16256812 | -0.05 | 0.08 | 0.55     |
|            |    |          |   |   | UBB         | 16284367 | 0.01  | 0.04 | 0.70     |
|            |    |          |   |   | TRPV2       | 16318856 | -0.01 | 0.04 | 0.85     |

|            |    |          |   |   |             |          |       |      |      |
|------------|----|----------|---|---|-------------|----------|-------|------|------|
|            |    |          |   |   | LRRC75A-AS1 | 16342301 | 0.03  | 0.03 | 0.30 |
|            |    |          |   |   | ZNF624      | 16557167 | 0.07  | 0.05 | 0.16 |
|            |    |          |   |   | TNFRSF13B   | 16875402 | 0.20  | 0.11 | 0.07 |
|            |    |          |   |   | PLD6        | 17109646 | 0.30  | 0.13 | 0.02 |
|            |    |          |   |   | COPS3       | 17184617 | 0.07  | 0.04 | 0.07 |
|            |    |          |   |   | RASD1       | 17399709 | 0.05  | 0.09 | 0.62 |
|            |    |          |   |   | PEMT        | 17495017 | -0.10 | 0.06 | 0.09 |
|            |    |          |   |   | RAI1        | 17584787 | 0.01  | 0.02 | 0.60 |
| rs11086029 | 19 | 16438661 | T | A | AKAP8       | 15490612 | 0.03  | 0.02 | 0.24 |
|            |    |          |   |   | AKAP8L      | 15529833 | 0.01  | 0.04 | 0.73 |
|            |    |          |   |   | RASAL3      | 15575382 | -0.04 | 0.05 | 0.52 |
|            |    |          |   |   | PGLYRP2     | 15590315 | 0.01  | 0.05 | 0.83 |
|            |    |          |   |   | CYP4F12     | 15783828 | -0.04 | 0.08 | 0.63 |
|            |    |          |   |   | OR10H1      | 15918936 | -0.02 | 0.05 | 0.73 |
|            |    |          |   |   | UCA1        | 15939757 | -0.01 | 0.05 | 0.83 |
|            |    |          |   |   | TPM4        | 16187135 | 0.01  | 0.12 | 0.96 |
|            |    |          |   |   | RAB8A       | 16222490 | -0.11 | 0.04 | 0.01 |
|            |    |          |   |   | HSH2D       | 16244838 | -0.07 | 0.08 | 0.41 |
|            |    |          |   |   | CIB3        | 16284286 | -0.01 | 0.03 | 0.72 |
|            |    |          |   |   | FAM32A      | 16296235 | -0.02 | 0.03 | 0.55 |
|            |    |          |   |   | AP1M1       | 16308665 | 0.05  | 0.03 | 0.17 |
|            |    |          |   |   | KLF2        | 16435651 | -0.11 | 0.09 | 0.23 |
|            |    |          |   |   | CHERP       | 16653263 | 0.01  | 0.01 | 0.35 |
|            |    |          |   |   | SLC35E1     | 16683193 | -0.02 | 0.03 | 0.53 |
|            |    |          |   |   | MED26       | 16739015 | -0.02 | 0.03 | 0.54 |
|            |    |          |   |   | SMIM7       | 16770968 | -0.02 | 0.03 | 0.52 |
|            |    |          |   |   | SIN3B       | 16940209 | 0.01  | 0.04 | 0.83 |
|            |    |          |   |   | CPAMD8      | 17137625 | -0.01 | 0.05 | 0.88 |
|            |    |          |   |   | HAUS8       | 17186343 | 0.02  | 0.03 | 0.55 |
|            |    |          |   |   | MYO9B       | 17186591 | 0.01  | 0.03 | 0.80 |
|            |    |          |   |   | USE1        | 17326155 | 0.00  | 0.05 | 0.96 |
|            |    |          |   |   | OCEL1       | 17337055 | -0.01 | 0.03 | 0.65 |
|            |    |          |   |   | BABAM1      | 17378232 | 0.03  | 0.04 | 0.44 |
|            |    |          |   |   | MRPL34      | 17416477 | 0.03  | 0.03 | 0.32 |
| rs6066835  | 20 | 47355009 | T | C | SULF2       | 46414808 | -0.49 | 0.34 | 0.15 |
|            |    |          |   |   | LINC00494   | 46988654 | -0.13 | 0.11 | 0.25 |
|            |    |          |   |   | PREX1       | 47444420 | 0.09  | 0.09 | 0.34 |
|            |    |          |   |   | ARFGEF2     | 47538275 | 0.02  | 0.04 | 0.53 |
|            |    |          |   |   | CSE1L       | 47662783 | 0.03  | 0.05 | 0.46 |
|            |    |          |   |   | STAU1       | 47804904 | 0.02  | 0.03 | 0.61 |
|            |    |          |   |   | DDX27       | 47835832 | 0.00  | 0.04 | 0.91 |
|            |    |          |   |   | ZFAS1       | 47894715 | -0.03 | 0.07 | 0.66 |
|            |    |          |   |   | ZNFX1       | 47894756 | -0.05 | 0.08 | 0.54 |

|          |          |          |      |      |          |          |          |      |      |
|----------|----------|----------|------|------|----------|----------|----------|------|------|
| rs138740 | 22       | 35699582 | C    | T    | B4GALT5  | 48330421 | -0.02    | 0.08 | 0.84 |
|          |          |          |      |      | HMGXB4   | 35653445 | 0.02     | 0.04 | 0.68 |
|          |          |          |      |      | HMOX1    | 35777060 | -0.27    | 0.16 | 0.08 |
|          |          |          |      |      | MCM5     | 35796116 | -0.07    | 0.05 | 0.16 |
|          |          |          |      |      | RASD2    | 35937352 | -0.08    | 0.04 | 0.04 |
|          |          |          |      |      | APOL6    | 36044424 | 0.00     | 0.04 | 0.99 |
|          |          |          |      |      | RBFOX2   | 36236630 | 0.02     | 0.05 | 0.72 |
|          |          |          |      |      | APOL3    | 36556977 | 0.17     | 0.10 | 0.08 |
|          |          |          |      |      | APOL2    | 36636000 | 0.01     | 0.02 | 0.68 |
|          |          |          |      |      | APOL1    | 36649117 | 0.02     | 0.08 | 0.76 |
|          |          |          |      |      | HMGXB4   | 35653445 | 0.03     | 0.03 | 0.39 |
|          |          |          |      |      | HMOX1    | 35777060 | 0.03     | 0.03 | 0.39 |
|          |          |          |      |      | MCM5     | 35796116 | 0.03     | 0.03 | 0.39 |
|          |          |          |      |      | RASD2    | 35937352 | 0.03     | 0.03 | 0.39 |
|          |          |          |      |      | APOL6    | 36044424 | 0.03     | 0.03 | 0.39 |
|          |          |          |      |      | RBFOX2   | 36236630 | 0.03     | 0.03 | 0.39 |
|          |          |          |      |      | APOL3    | 36556977 | 0.03     | 0.03 | 0.39 |
|          |          |          |      |      | APOL2    | 36636000 | 0.03     | 0.03 | 0.39 |
|          |          |          |      |      | APOL1    | 36649117 | 0.03     | 0.03 | 0.39 |
|          |          |          |      |      | rs877529 | 22       | 39542292 | G    | A    |
| TMEM184B | 38669040 | -0.05    | 0.04 | 0.18 |          |          |          |      |      |
| CSNK1E   | 38714089 | -0.02    | 0.03 | 0.57 |          |          |          |      |      |
| KDEL3    | 38864083 | -0.09    | 0.10 | 0.40 |          |          |          |      |      |
| DDX17    | 38902345 | -0.05    | 0.08 | 0.50 |          |          |          |      |      |
| CBY1     | 39052658 | 0.00     | 0.03 | 0.95 |          |          |          |      |      |
| TOMM22   | 39077954 | -0.06    | 0.03 | 0.06 |          |          |          |      |      |
| JOSD1    | 39096459 | 0.02     | 0.04 | 0.70 |          |          |          |      |      |
| GTPBP1   | 39101807 | 0.02     | 0.02 | 0.22 |          |          |          |      |      |
| SUN2     | 39151467 | -0.03    | 0.03 | 0.31 |          |          |          |      |      |
| CBX6     | 39268258 | 0.01     | 0.04 | 0.75 |          |          |          |      |      |
| APOBEC3B | 39378404 | 0.04     | 0.12 | 0.76 |          |          |          |      |      |
| APOBEC3C | 39410265 | -0.04    | 0.04 | 0.25 |          |          |          |      |      |
| APOBEC3F | 39436673 | -0.02    | 0.04 | 0.72 |          |          |          |      |      |
| APOBEC3G | 39473010 | 0.00     | 0.04 | 0.98 |          |          |          |      |      |
| CBX7     | 39548538 | -0.05    | 0.03 | 0.16 |          |          |          |      |      |
| RPL3     | 39715670 | 0.02     | 0.03 | 0.44 |          |          |          |      |      |
| SYNGR1   | 39745954 | 0.02     | 0.04 | 0.64 |          |          |          |      |      |
| TAB1     | 39795759 | 0.01     | 0.04 | 0.80 |          |          |          |      |      |
| MGAT3    | 39853325 | -0.02    | 0.02 | 0.24 |          |          |          |      |      |
| MIEF1    | 39898284 | -0.02    | 0.03 | 0.55 |          |          |          |      |      |
| RPS19BP1 | 39928860 | 0.00     | 0.03 | 0.89 |          |          |          |      |      |
| rs139402 | 22       | 39546145 | T    | C    | MAFF     | 38597939 | 0.05     | 0.11 | 0.62 |
|          |          |          |      |      | TMEM184B | 38669040 | -0.05    | 0.04 | 0.21 |



|          |          |       |      |      |
|----------|----------|-------|------|------|
| CSNK1E   | 38714089 | -0.02 | 0.03 | 0.57 |
| KDEL3    | 38864083 | -0.08 | 0.10 | 0.44 |
| DDX17    | 38902345 | -0.05 | 0.08 | 0.52 |
| CBY1     | 39052658 | 0.00  | 0.03 | 0.89 |
| TOMM22   | 39077954 | -0.06 | 0.03 | 0.06 |
| JOSD1    | 39096459 | 0.02  | 0.04 | 0.62 |
| GTPBP1   | 39101807 | 0.02  | 0.02 | 0.20 |
| SUN2     | 39151467 | -0.02 | 0.03 | 0.41 |
| CBX6     | 39268258 | 0.01  | 0.04 | 0.72 |
| APOBEC3B | 39378404 | 0.04  | 0.12 | 0.74 |
| APOBEC3C | 39410265 | -0.04 | 0.04 | 0.27 |
| APOBEC3F | 39436673 | -0.01 | 0.04 | 0.80 |
| APOBEC3G | 39473010 | 0.00  | 0.04 | 0.97 |
| CBX7     | 39548538 | -0.04 | 0.03 | 0.19 |
| RPL3     | 39715670 | 0.02  | 0.03 | 0.41 |
| SYNGR1   | 39745954 | 0.02  | 0.04 | 0.65 |
| TAB1     | 39795759 | 0.01  | 0.04 | 0.74 |
| MGAT3    | 39853325 | -0.02 | 0.02 | 0.36 |
| MIEF1    | 39898284 | -0.01 | 0.03 | 0.66 |
| RPS19BP1 | 39928860 | 0.00  | 0.03 | 0.87 |

---

Supplementary Table S4. Associations between unweighted categorical polygenic risk scores (PRSs) and multiple myeloma risk in 1,813 patients and 8,871 controls of African ancestry.

| Polygenic Risk Score Category <sup>a</sup> | Number of Cases | Number of Controls | OR(95% CI)      | P-value               | P <sub>Het</sub> |
|--------------------------------------------|-----------------|--------------------|-----------------|-----------------------|------------------|
| 0%-10%                                     | 115             | 888                | 0.67(0.54,0.83) | 1.78x10 <sup>-4</sup> | 0.48             |
| 10%-25%                                    | 200             | 1331               | 0.76(0.64,0.90) | 1.32x10 <sup>-3</sup> | 0.52             |
| 25%-75%(baseline)                          | 865             | 4434               | 1               | -                     | -                |
| 75%-90%                                    | 352             | 1330               | 1.36(1.18,1.56) | 2.05x10 <sup>-5</sup> | 0.90             |
| 90%-100%                                   | 280             | 888                | 1.60(1.37,1.87) | 2.95x10 <sup>-9</sup> | 0.40             |

Odds Ratios (ORs) were adjusted for age, sex, and PCs1-10; P-values were Wald P-values; P<sub>Het</sub> were P-value of heterogeneity in fixed-effect meta analyses

a: The unweighted PRS were constructed using the known 22 index SNPs reported in European GWAS, weights were assigned to 1.

Supplementary Figure S1. Quality control flow chart of AA MM study

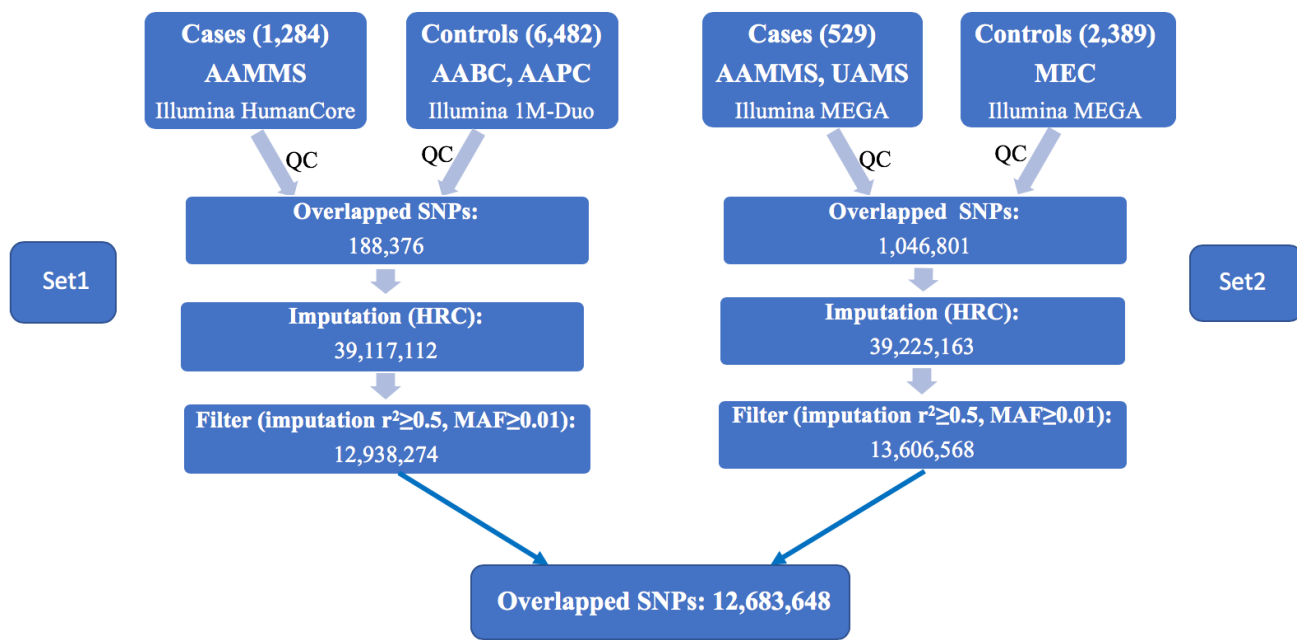

**Supplementary Figure S2. Manhattan plots for multiple myeloma GWAS in AA population.** This figure shows all genotyped and imputed results of the overlapped SNPs across two sets. The upper plot a) excluded SNPs with MAF<0.01 and imputation score ( $r^2$ )<0.5; while the lower plot b) excluded SNPs with MAF<0.01 and imputation score ( $r^2$ )<0.8. The orange line represents the genome-wide significant cut-off value of  $P = 5 \times 10^{-8}$ . Blue line represents the suggestive cut-off value of  $P = 1 \times 10^{-6}$ . Green dots represent known risk alleles for MM in European population.

a)

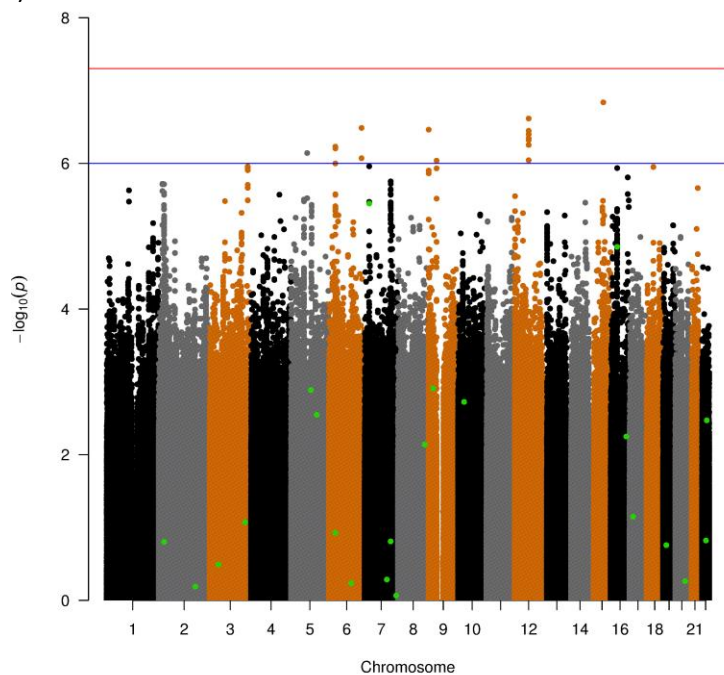

b)

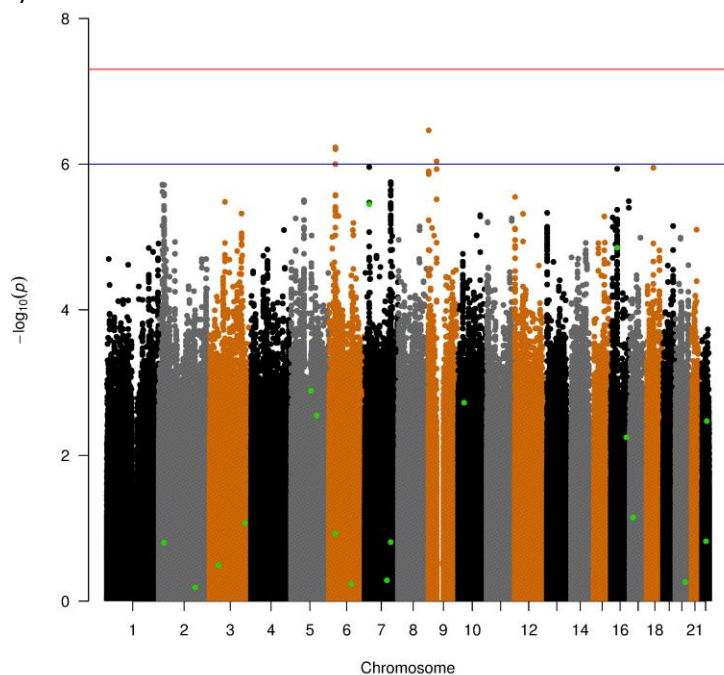

**Supplementary Figure S3. Regional association plots of the suggestive novel risk regions at 9p24.3 (0.2-1.2MB) and 9p13.1 (37.8-38.8MB) associated with multiple myeloma risk in AA population. Single-nucleotide polymorphisms (SNPs) are plotted by position (x-axis) and  $-\log_{10}P$ -value (y-axis). SNPs with MAF<0.01 and imputation score ( $r^2$ )<0.8 were excluded.  $r^2$  was estimated in African individuals of phase III 1000 Genomes Project (1KGP). The most statistically significant associated SNP (purple dot) in 9p24.3 is rs13296848 (chr9:701529) and in 9p13.1 is rs7034061 (chr9:38443792), and the surrounding SNPs are colored to indicate pairwise correlation with the index SNP.**

a)

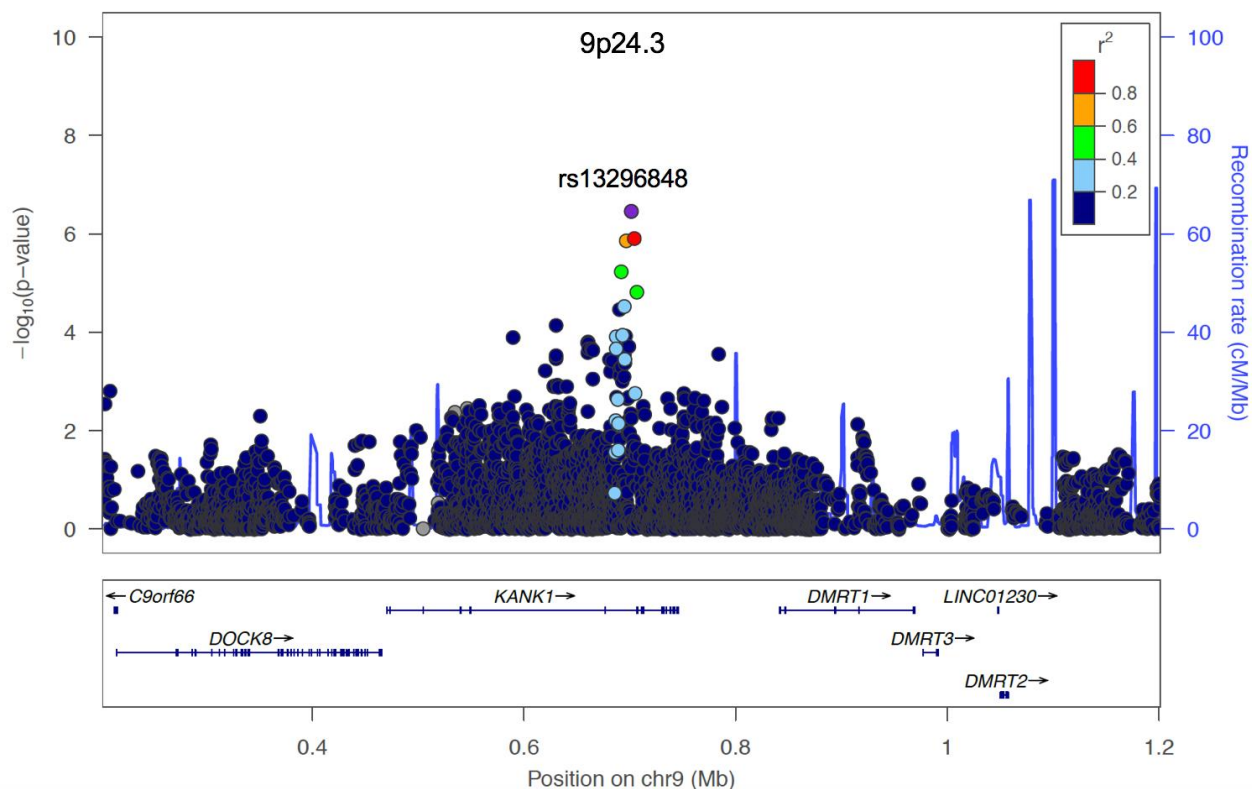

b)

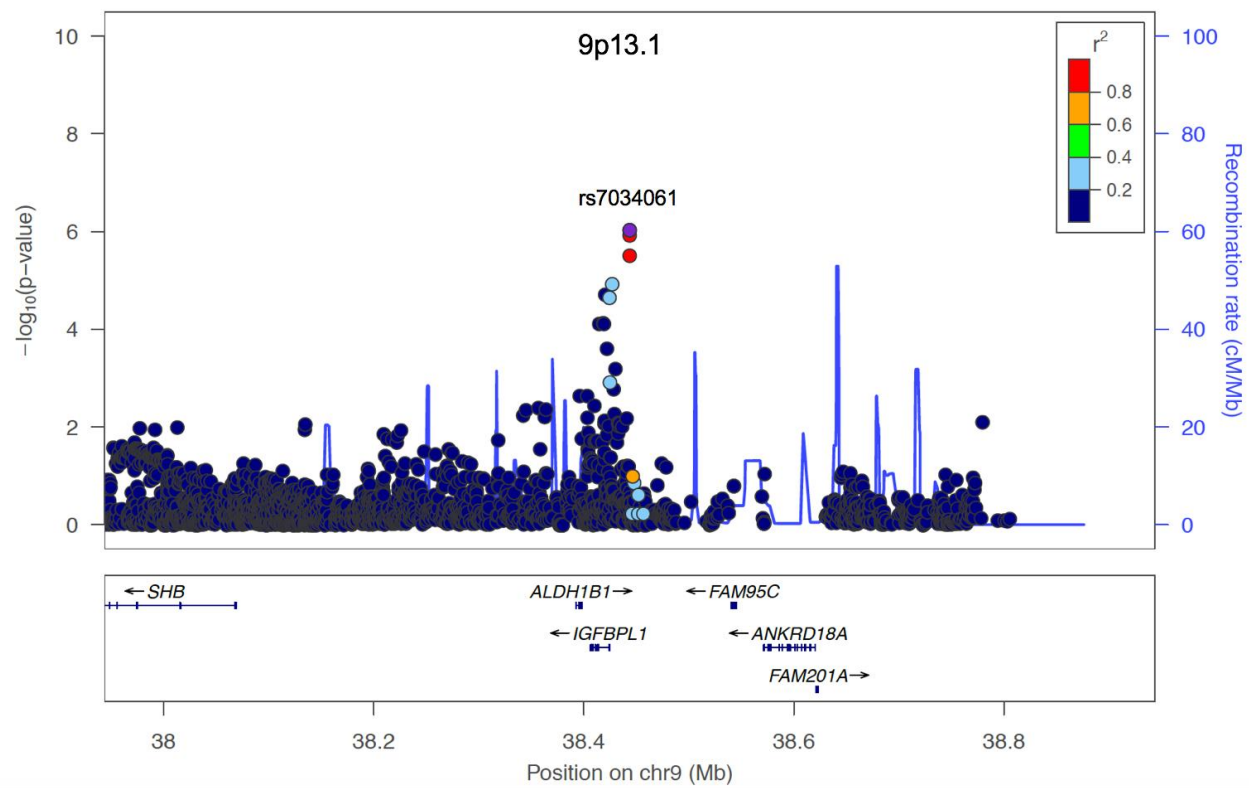

**Supplementary figure S4. Scatter plots of admixture mapping analyses of multiple myeloma at chromosome 2 (0-150 MB) in AA population.** x-axis is chromosome position in MB and y-axis is  $-\log_{10}P$ -value for admixture association in case-control analysis (upper plot) and case-only analysis (lower plot) of local African ancestry on chromosome 2 (0-150MB). Purple lines indicate known MM risk loci (rs10180663). Dotted lines are  $-\log_{10}P$ -values of 5 and 6.

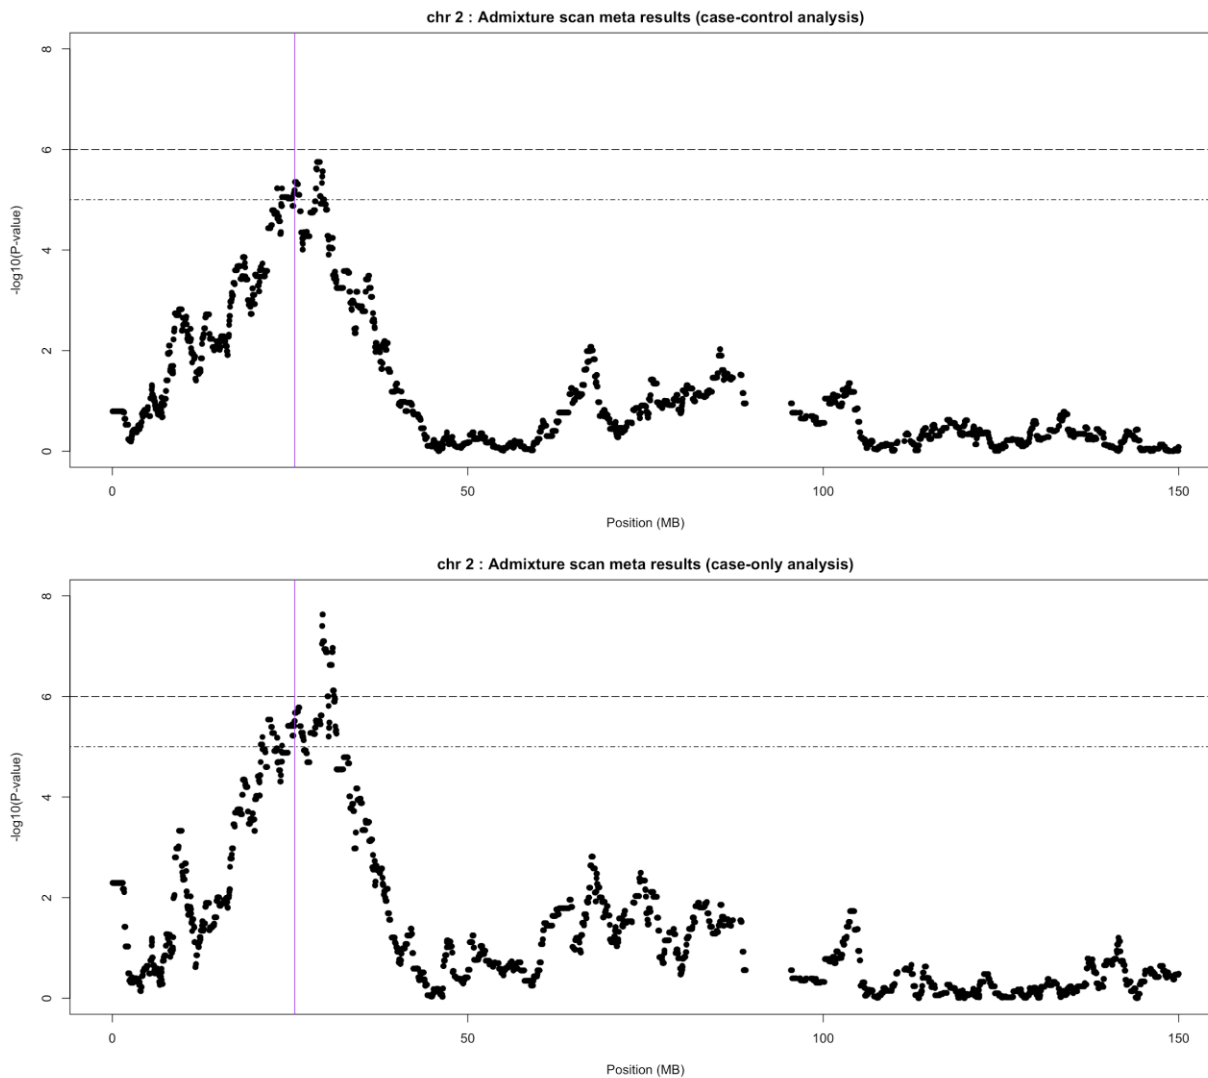

**Supplementary Figure S5. Negative  $\log_{10}(P\text{-value})$  plot for admixture associations in case-control analyses of local African ancestry at chromosome 2 (23.1- 29.8 Mb) in AA population.** x-axis is chromosome position, y-axis is  $-\log_{10}P\text{-value}$  of local African ancestry. Grey dots are marginal results adjusted for age, sex, and the first ten principle components; orange dots are conditional results with additional adjusting for the known risk allele rs6746082, blue dots are conditional results with additional adjusting for the better AA marker rs10180663, and red dots are conditional results with additional adjusting for independent SNPs (rs10180663, rs10169985, rs6734496) at 23.1- 29.8 Mb identified by forward-selection logistic regression.

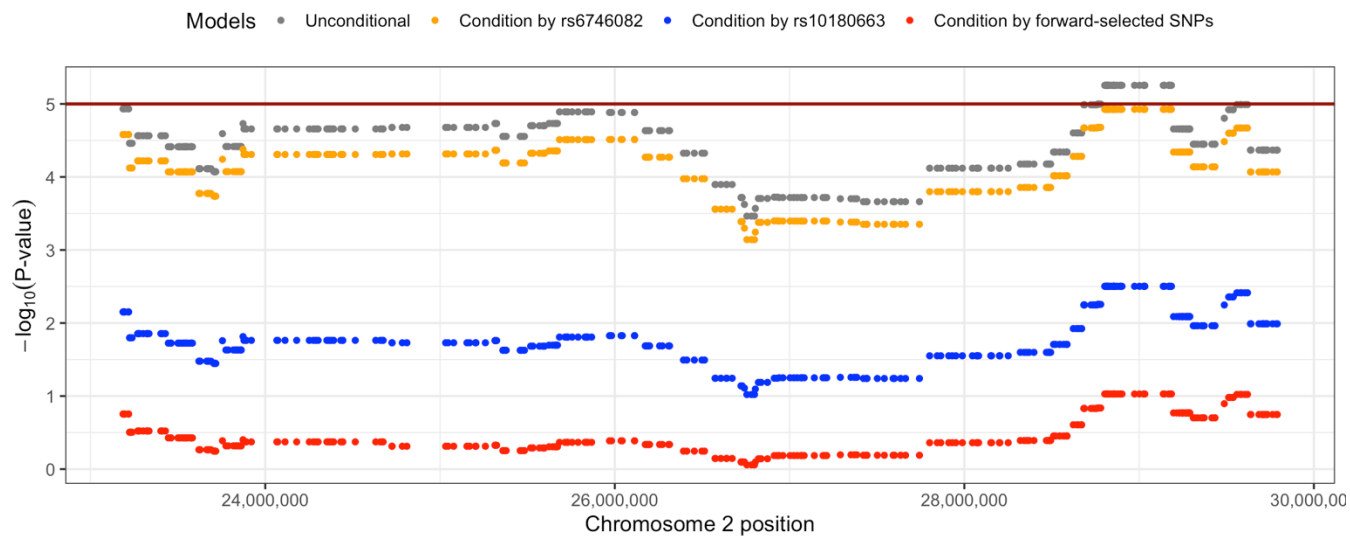



**Supplementary Figure S6. The odds ratios of local African ancestry on multiple myeloma risk with/without adjusting for allele dosages in case-control analyses at chromosome 2 (23.1- 29.8 Mb) in AA population.** x-axis is chromosome position, y-axis is odds ratios (ORs) of local African ancestry. Grey dots are marginal ORs adjusted for age, sex, and the first ten principle components; orange dots are conditional ORs with additional adjusting for the known risk allele rs6746082, blue dots are conditional ORs with additional adjusting for the better AA marker rs10180663, and red dots are conditional ORs with additional adjusting for independent SNPs (rs10180663, rs10169985, rs6734496) at 23.1- 29.8 Mb identified by forward-selection logistic regression. The grey region represents the  $\pm 15\%$  change of marginal ORs.

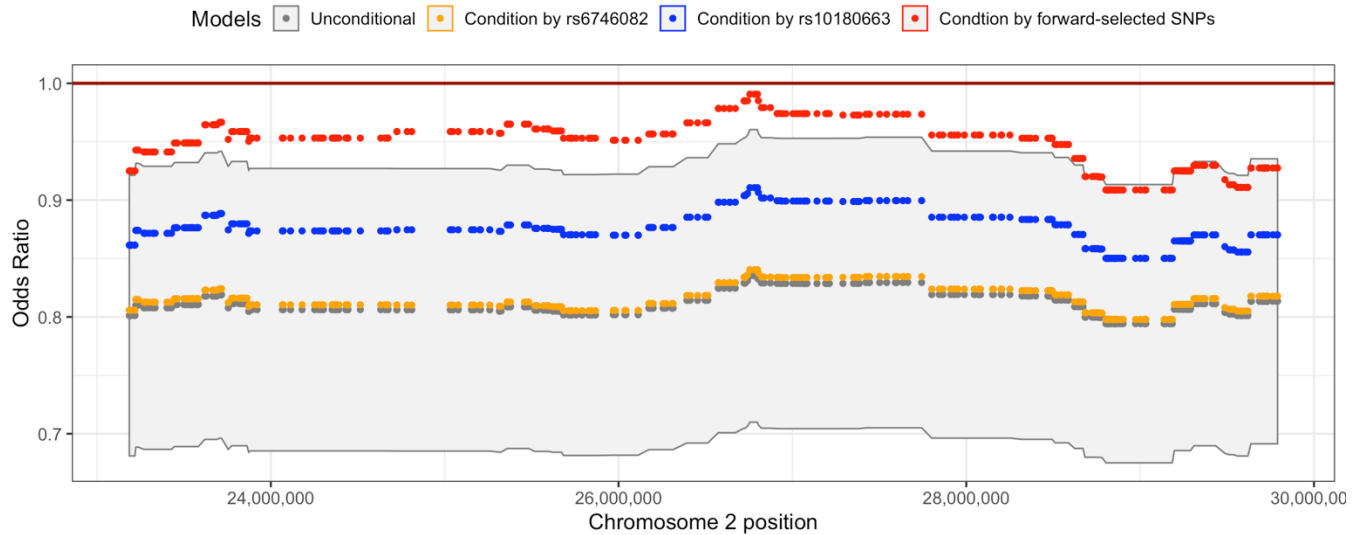

**Supplementary Figure S7. LocusZoom plots for variants located at the 22 known multiple myeloma risk loci among AA individuals ( $r^2$  computed from European population in 1KGP).** Single-nucleotide polymorphisms (SNPs) are plotted by position (x-axis) and  $-\log_{10}P$ -value (y-axis). SNPs with MAF<0.01 and imputation score ( $r^2$ )<0.8 were excluded.  $r^2$  was calculated in European individuals of phase III 1KGP. The purple diamonds are index SNPs reported by previous GWAS studies, and the surrounding SNPs are colored to indicate pairwise correlation with the index SNP.

### 2p23.3

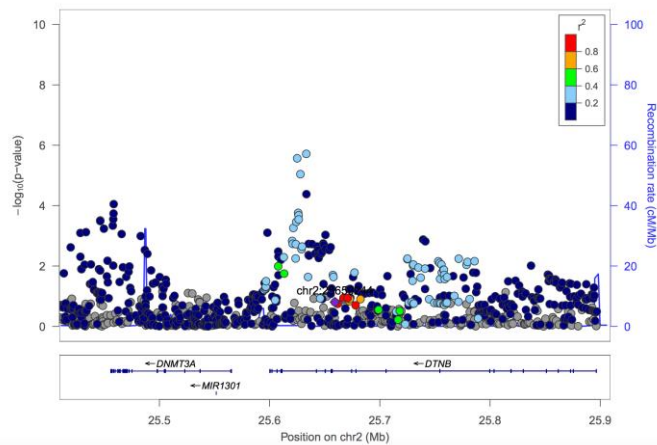

### 2q31.1

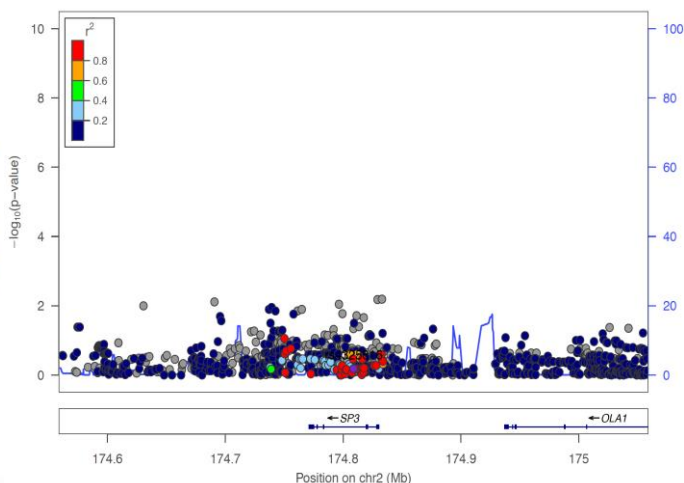

### 3p22.1

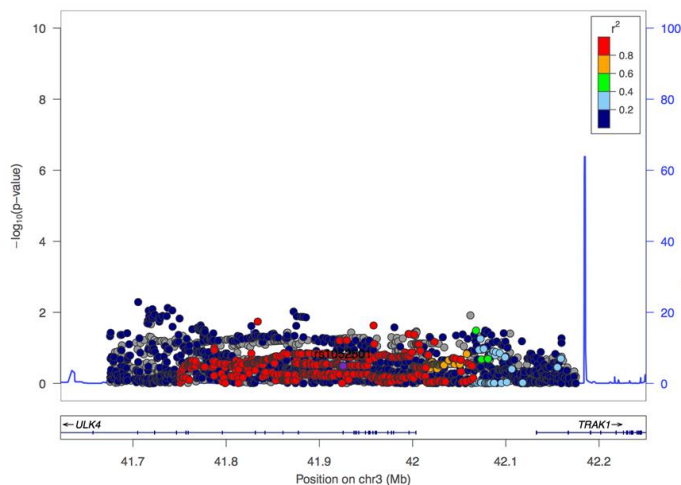

### 3q26.2

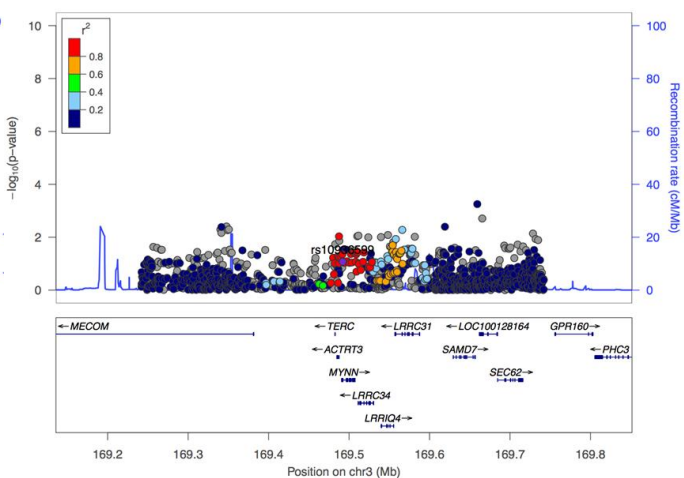

### 5q15

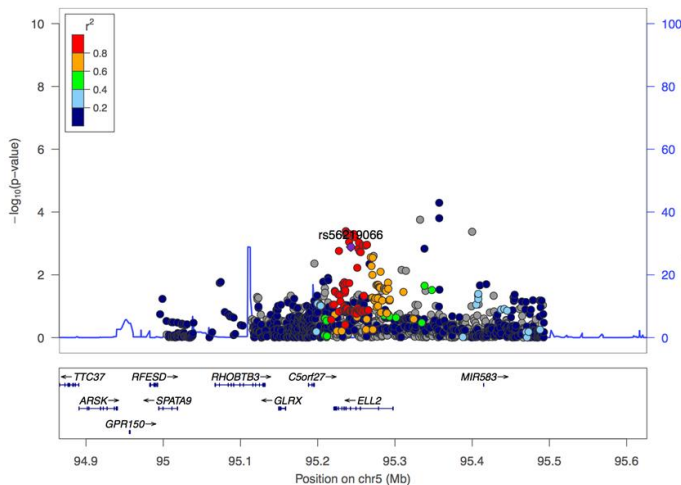

### 5q23.2

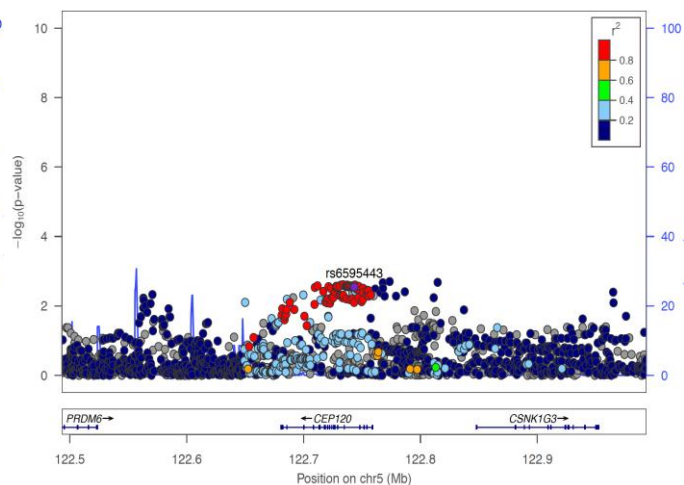

### 6p21.33

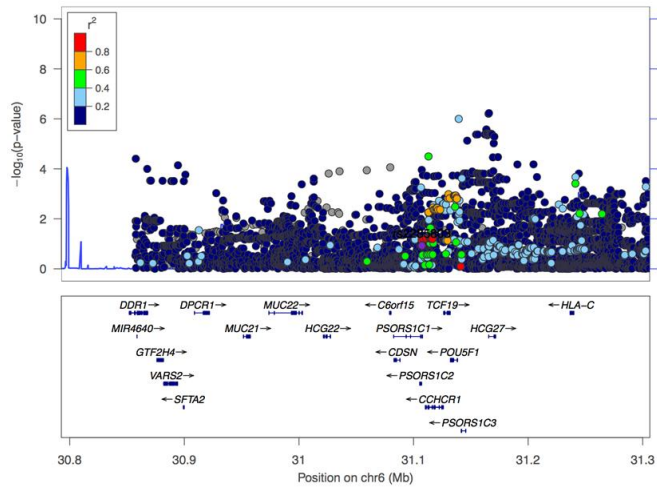

### 6q21

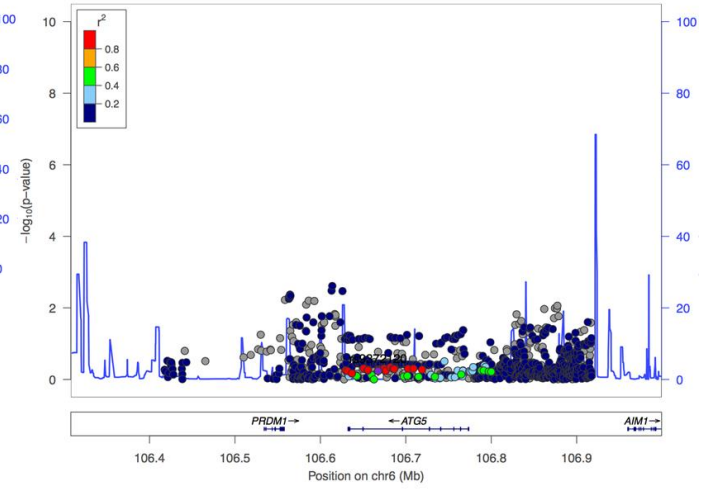

### 7p15.3

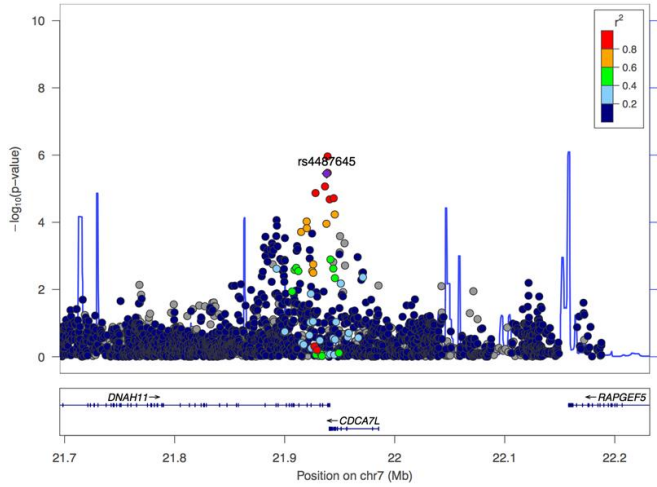

### 7q22.3

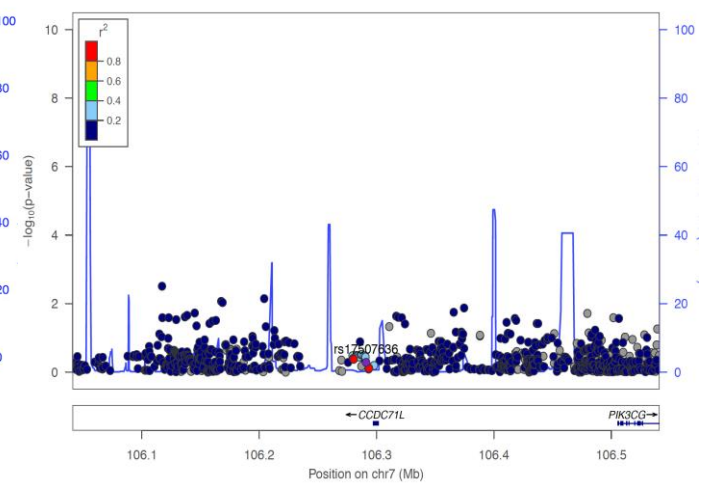

### 7q22.3

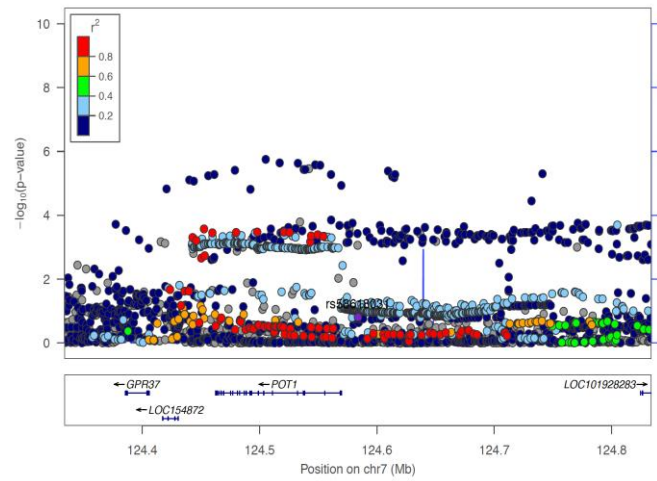

### 7q36.1

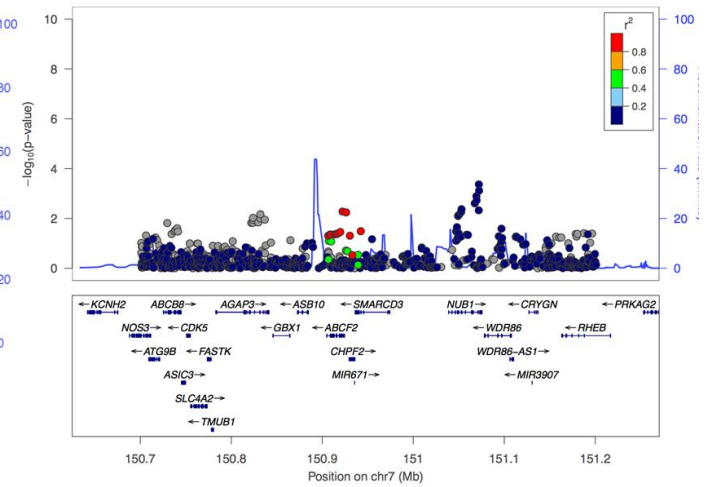

### 8q24.21

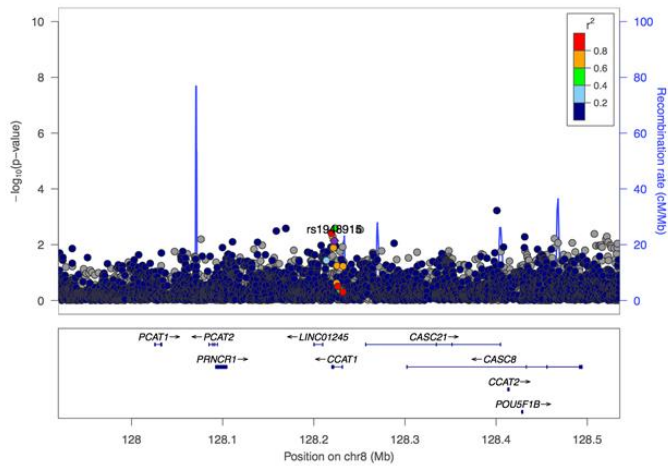

### 9p21.3

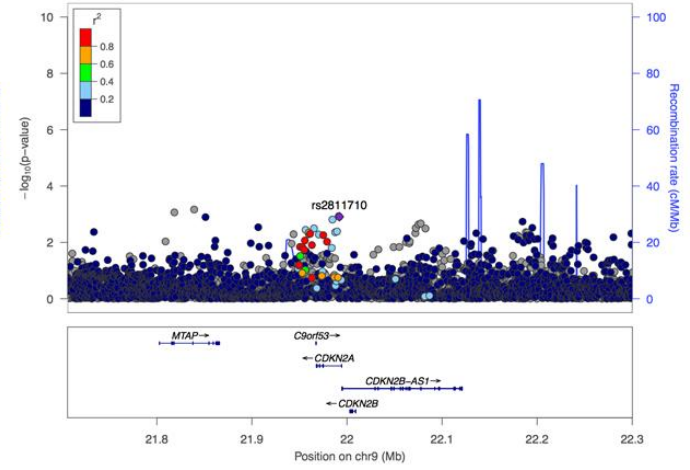

### 10p12.1

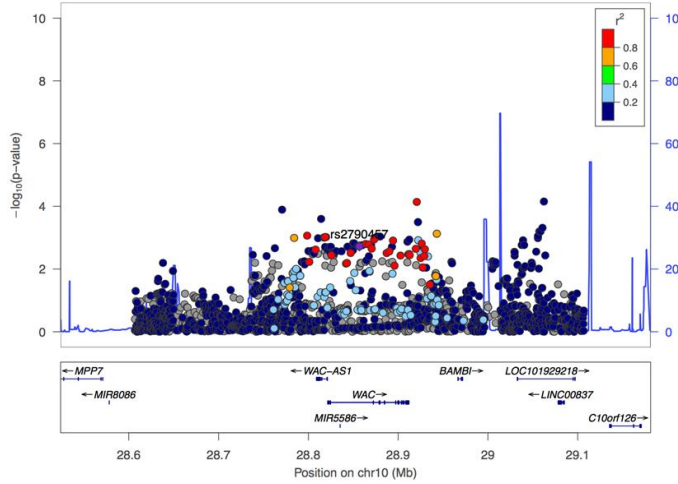

### 16p11.2

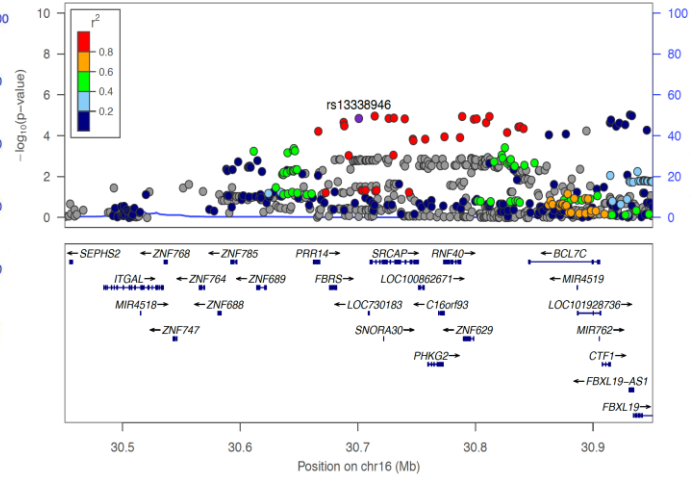

### 16q23.1

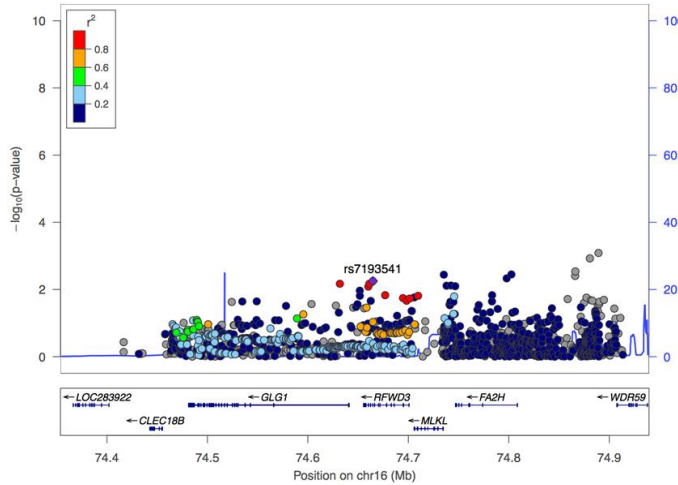

### 17p11.2

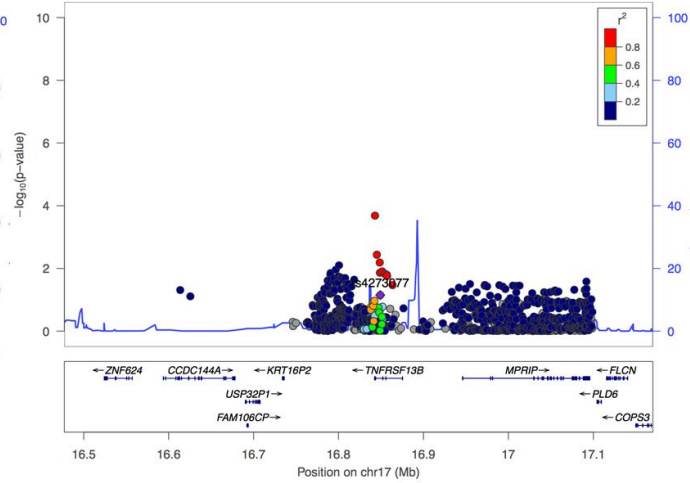

### 19p13.11

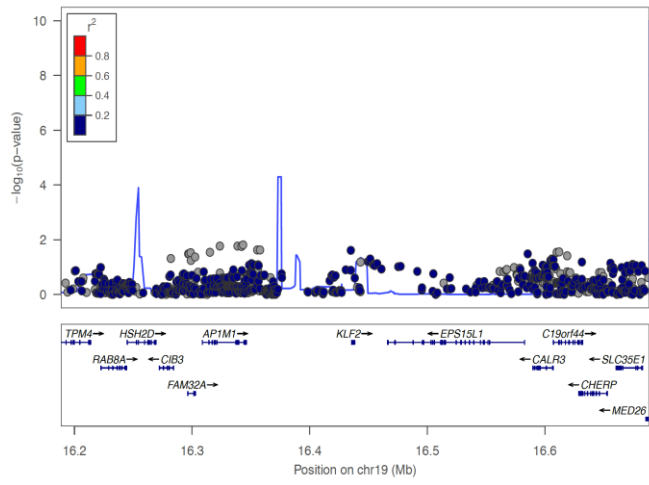

### 20q13.13

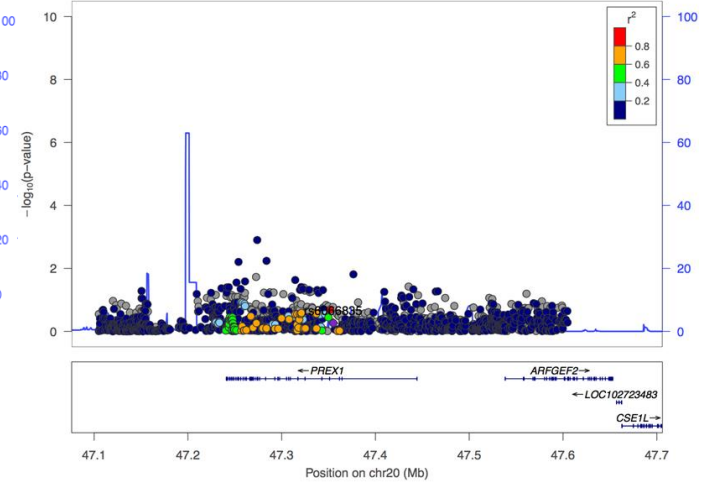

### 22q13

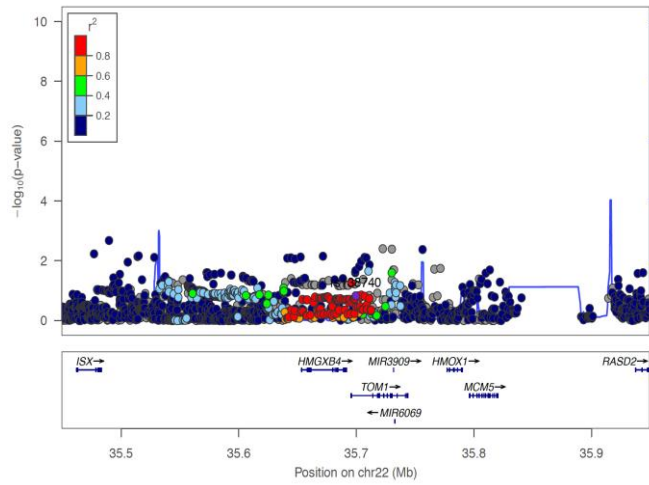

### 22q13.1

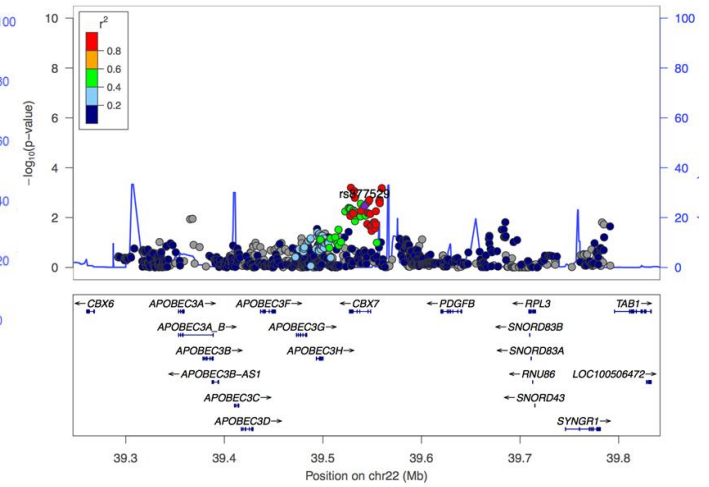



**Supplementary figure S8. Functional annotation in UCSC Genome Browser for allele rs13296848 and its correlated SNPs.** Variant with blue color is the index SNP rs13296848. Variants with yellow color are SNPs in association with the index SNP rs13296848 ( $r^2 > 0.4$  in African population of 1KGP).

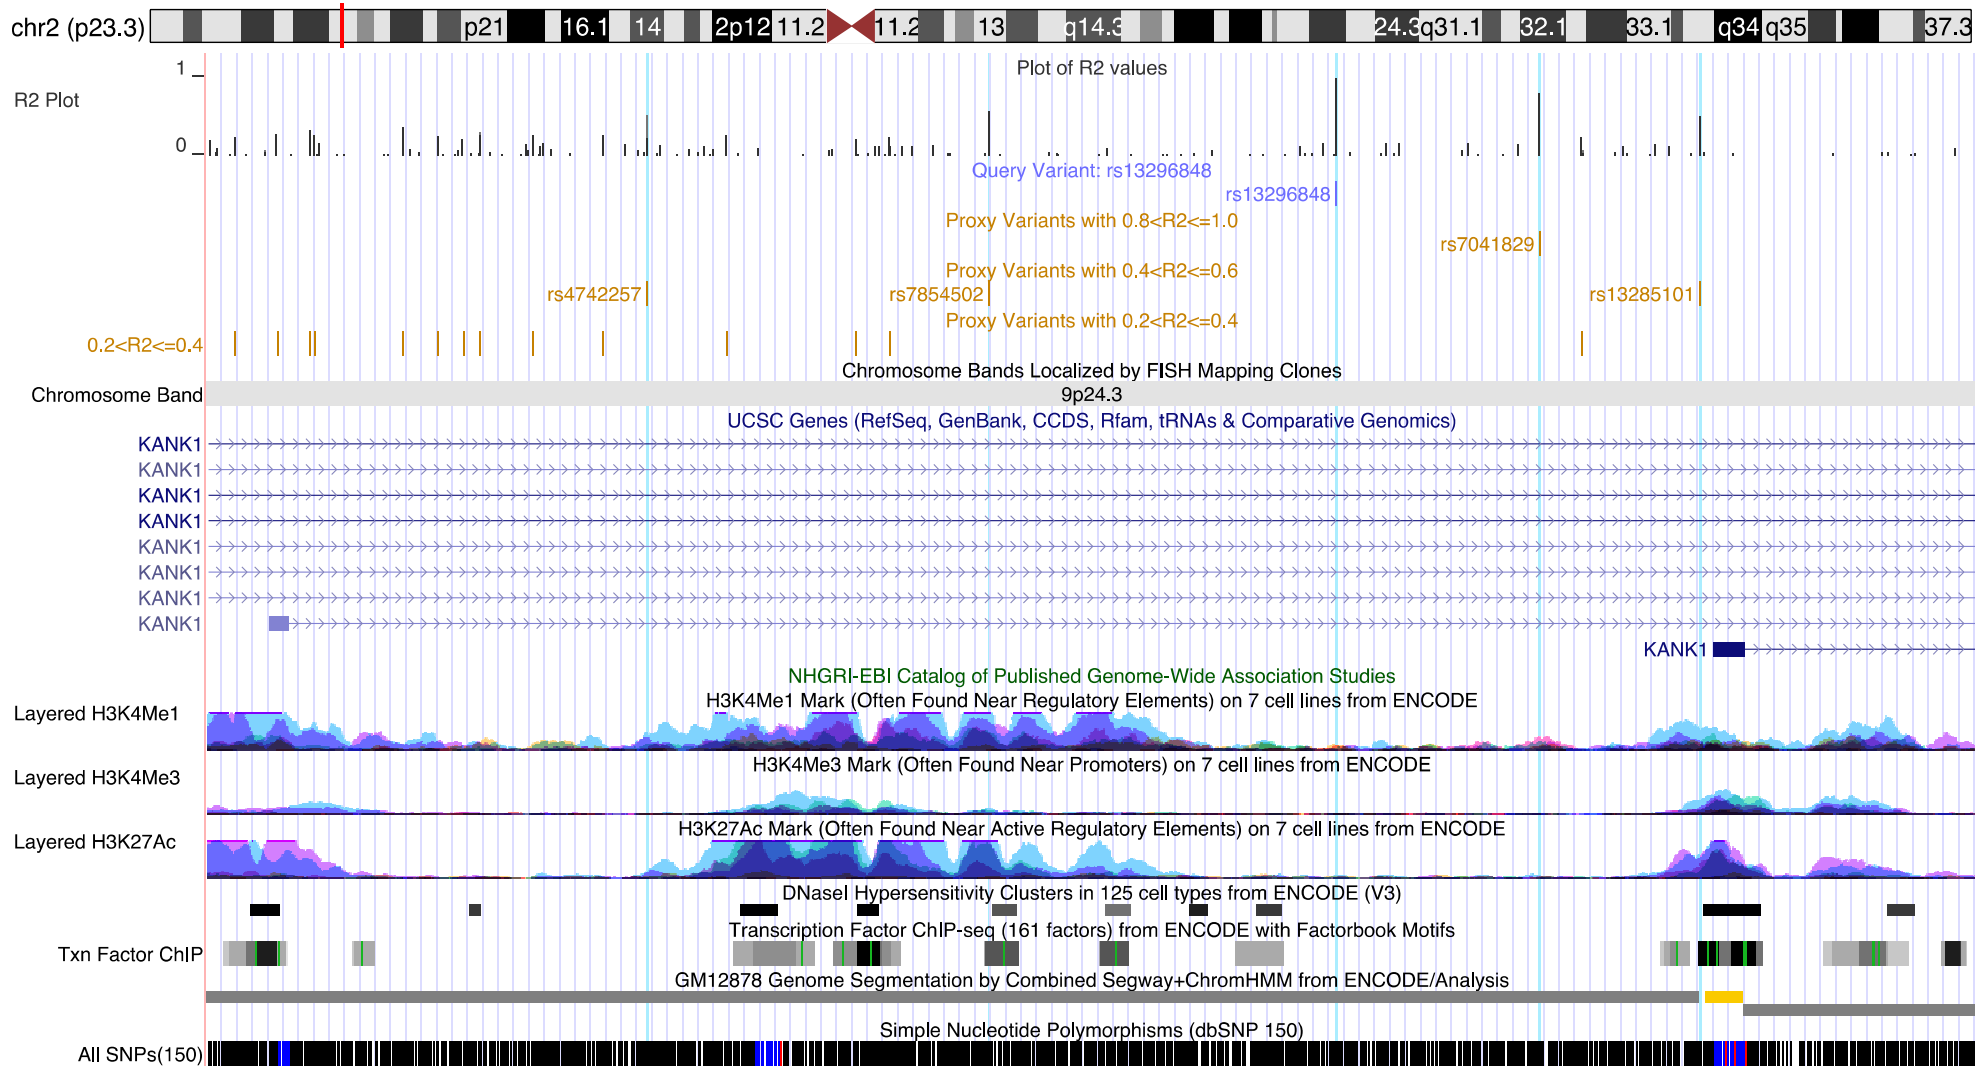

Supplement: baADV2019000491-suppl1.pdf [file baADV2019000491-suppl1.pdf]
